# Supplementary material for: Population isolation in the Plains spadefoot toad: causes and conservation implications
Source: PeerJ. 2024 Oct 7;12:e17968. doi: 10.7717/peerj.17968 (PMC11466216; doi:10.7717/peerj.17968)
Supplement: Supplemental Information 8 [file peerj-12-17968-s008.xlsx]

## Sheet: ComparisonSpecies
FID	cat	latitude	longitude	species
0	60446	24.12	-98.82	Anaxyrus_speciosus
1	60447	24.21	-98.48	Anaxyrus_speciosus
2	60412	24.21	-98.48	Smilisca_baudinii
3	85077	24.6076	-98.2991	Scaphiopus_couchii
4	85076	24.6076	-98.2991	Scaphiopus_couchii
5	200827	24.61	-98.3	Rana_berlandieri
6	200826	24.61	-98.3	Rana_berlandieri
7	0	24.7667	-98.6667	Anaxyrus_speciosus
8	60152	25.42	-97.84	Scaphiopus_couchii
9	60433	25.51	-97.75	Anaxyrus_speciosus
10	36704	25.7997	-98.2778	Rana_berlandieri
11	36705	25.7997	-98.2778	Rana_berlandieri
12	36706	25.7997	-98.2778	Rana_berlandieri
13	92600	25.8541	-97.3979	Eleutherodactylus_cystignathoid
14	92601	25.8541	-97.3979	Eleutherodactylus_cystignathoid
15	92603	25.8541	-97.3979	Eleutherodactylus_cystignathoid
16	92599	25.8541	-97.3979	Eleutherodactylus_cystignathoid
17	92602	25.8541	-97.3979	Eleutherodactylus_cystignathoid
18	92594	25.8541	-97.3979	Gastrophyrne_olivacea
19	92595	25.8541	-97.3979	Gastrophyrne_olivacea
20	92596	25.8541	-97.3979	Gastrophyrne_olivacea
21	92593	25.8541	-97.3979	Gastrophyrne_olivacea
22	93093	25.8541	-97.3979	Rana_berlandieri
23	93094	25.8541	-97.3979	Rana_berlandieri
24	92598	25.8541	-97.3979	Scaphiopus_couchii
25	92605	25.8541	-97.3979	Smilisca_baudinii
26	95151	25.8542	-97.3976	Rana_berlandieri
27	15450	25.87	-97.56	Pseudacris_clarkii
28	15449	25.87	-97.56	Pseudacris_clarkii
29	0	25.8981	-97.491	Eleutherodactylus_cystignathoid
30	0	25.8981	-97.491	Eleutherodactylus_cystignathoid
31	2610	25.9	-97.5	Anaxyrus_speciosus
32	43636	25.9014	-97.4972	Hypopachus_variolosus
33	43637	25.9014	-97.4972	Hypopachus_variolosus
34	43636	25.9014	-97.4972	Rana_palustris
35	43637	25.9014	-97.4972	Rana_palustris
36	43636	25.9014	-97.4972	Rana_sphenocephala
37	43637	25.9014	-97.4972	Rana_sphenocephala
38	86301	25.9014	-97.4972	Rana_berlandieri
39	86299	25.9014	-97.4972	Rana_berlandieri
40	86303	25.9014	-97.4972	Rana_berlandieri
41	86300	25.9014	-97.4972	Rana_berlandieri
42	86302	25.9014	-97.4972	Rana_berlandieri
43	2200	25.9079	-97.4843	Pseudacris_clarkii
44	2199	25.9079	-97.4843	Pseudacris_clarkii
45	51755	25.9138	-97.4934	Smilisca_baudinii
46	0	25.9146	-97.3907	Gastrophyrne_olivacea
47	68354	25.923	-97.189	Pseudacris_clarkii
48	68355	25.923	-97.189	Pseudacris_clarkii
49	68356	25.923	-97.189	Pseudacris_clarkii
50	68357	25.923	-97.189	Pseudacris_clarkii
51	68358	25.923	-97.189	Pseudacris_clarkii
52	15454	25.9517	-97.3964	Gastrophyrne_olivacea
53	15456	25.9517	-97.3964	Gastrophyrne_olivacea
54	15457	25.9517	-97.3964	Gastrophyrne_olivacea
55	15455	25.9517	-97.3964	Gastrophyrne_olivacea
56	15453	25.9517	-97.3964	Pseudacris_clarkii
57	15451	25.9517	-97.3964	Pseudacris_clarkii
58	15452	25.9517	-97.3964	Pseudacris_clarkii
59	15459	25.9517	-97.3964	Rana_berlandieri
60	15460	25.9517	-97.3964	Rana_berlandieri
61	0	26.0019	-97.467	Eleutherodactylus_cystignathoid
62	0	26.0019	-97.467	Eleutherodactylus_cystignathoid
63	93788	26.0211	-97.4748	Pseudacris_clarkii
64	93789	26.0211	-97.4748	Pseudacris_clarkii
65	93790	26.0211	-97.4748	Pseudacris_clarkii
66	93783	26.0289	-97.4751	Gastrophyrne_olivacea
67	93794	26.0289	-97.4751	Rana_berlandieri
68	93792	26.0289	-97.4751	Rana_berlandieri
69	93796	26.0289	-97.4751	Scaphiopus_couchii
70	93797	26.0289	-97.4751	Scaphiopus_couchii
71	13412	26.03	-98.57	Rana_berlandieri
72	13413	26.03	-98.57	Rana_berlandieri
73	93799	26.0396	-97.479	Scaphiopus_couchii
74	299652	26.0625	-98.0292	Smilisca_baudinii
75	299656	26.0667	-97.875	Eleutherodactylus_cystignathoid
76	299655	26.0667	-97.875	Eleutherodactylus_cystignathoid
77	9385	26.0714	-97.5246	Scaphiopus_couchii
78	9386	26.0714	-97.5246	Scaphiopus_couchii
79	13496	26.0717	-98.1424	Eleutherodactylus_cystignathoid
80	13495	26.0717	-98.1424	Eleutherodactylus_cystignathoid
81	299646	26.075	-98.1292	Smilisca_baudinii
82	95484	26.081	-98.1362	Smilisca_baudinii
83	36520	26.082	-97.306	Rana_berlandieri
84	74891	26.0838	-98.0533	Rana_berlandieri
85	34454	26.0873	-97.9421	Eleutherodactylus_cystignathoid
86	34509	26.0873	-97.9421	Gastrophyrne_olivacea
87	68340	26.107	-97.601	Eleutherodactylus_cystignathoid
88	68341	26.107	-97.601	Eleutherodactylus_cystignathoid
89	68342	26.107	-97.601	Eleutherodactylus_cystignathoid
90	299631	26.1292	-98.3292	Anaxyrus_speciosus
91	299634	26.1292	-98.3292	Hypopachus_variolosus
92	299633	26.1292	-98.3292	Hypopachus_variolosus
93	299632	26.1292	-98.3292	Hypopachus_variolosus
94	299634	26.1292	-98.3292	Rana_palustris
95	299633	26.1292	-98.3292	Rana_palustris
96	299632	26.1292	-98.3292	Rana_palustris
97	299634	26.1292	-98.3292	Rana_sphenocephala
98	299633	26.1292	-98.3292	Rana_sphenocephala
99	299632	26.1292	-98.3292	Rana_sphenocephala
100	238725	26.1458	-97.6611	Gastrophyrne_olivacea
101	0	26.1532	-97.9916	Eleutherodactylus_cystignathoid
102	0	26.1532	-97.9916	Eleutherodactylus_cystignathoid
103	17659	26.1595	-97.9907	Eleutherodactylus_cystignathoid
104	17658	26.1595	-97.9907	Eleutherodactylus_cystignathoid
105	17660	26.1595	-97.9907	Eleutherodactylus_cystignathoid
106	75119	26.1595	-97.9907	Hypopachus_variolosus
107	75119	26.1595	-97.9907	Rana_palustris
108	75119	26.1595	-97.9907	Rana_sphenocephala
109	13323	26.1622	-98.1585	Scaphiopus_couchii
110	40389	26.1643	-98.1724	Rana_berlandieri
111	129065	26.1646	-98.3819	Rana_berlandieri
112	129069	26.1646	-98.3819	Rana_berlandieri
113	129071	26.1646	-98.3819	Rana_berlandieri
114	129072	26.1646	-98.3819	Rana_berlandieri
115	129074	26.1646	-98.3819	Rana_berlandieri
116	129076	26.1646	-98.3819	Rana_berlandieri
117	129077	26.1646	-98.3819	Rana_berlandieri
118	129079	26.1646	-98.3819	Rana_berlandieri
119	129081	26.1646	-98.3819	Rana_berlandieri
120	129083	26.1646	-98.3819	Rana_berlandieri
121	129066	26.1646	-98.3819	Rana_berlandieri
122	129067	26.1646	-98.3819	Rana_berlandieri
123	129068	26.1646	-98.3819	Rana_berlandieri
124	129070	26.1646	-98.3819	Rana_berlandieri
125	129073	26.1646	-98.3819	Rana_berlandieri
126	129075	26.1646	-98.3819	Rana_berlandieri
127	129078	26.1646	-98.3819	Rana_berlandieri
128	129080	26.1646	-98.3819	Rana_berlandieri
129	129082	26.1646	-98.3819	Rana_berlandieri
130	52844	26.1756	-98.3825	Gastrophyrne_olivacea
131	52825	26.1756	-98.3825	Rana_berlandieri
132	52826	26.1756	-98.3825	Rana_berlandieri
133	8356	26.1809	-97.5198	Eleutherodactylus_cystignathoid
134	8355	26.1809	-97.5198	Eleutherodactylus_cystignathoid
135	74003	26.1903	-97.6958	Bufo_debilis
136	53682	26.191	-98.317	Rana_berlandieri
137	78572	26.1921	-98.3782	Rana_berlandieri
138	35677	26.193	-98.3781	Anaxyrus_punctatus
139	35705	26.193	-98.3781	Scaphiopus_couchii
140	51882	26.195	-98.184	Rana_berlandieri
141	53173	26.2257	-98.2305	Hypopachus_variolosus
142	53174	26.2257	-98.2305	Hypopachus_variolosus
143	53173	26.2257	-98.2305	Rana_palustris
144	53174	26.2257	-98.2305	Rana_palustris
145	53173	26.2257	-98.2305	Rana_sphenocephala
146	53174	26.2257	-98.2305	Rana_sphenocephala
147	38914	26.2292	-100.093	Rana_berlandieri
148	38910	26.2292	-100.093	Scaphiopus_couchii
149	299673	26.2333	-98.3667	Scaphiopus_couchii
150	299675	26.2333	-98.3667	Scaphiopus_couchii
151	299674	26.2333	-98.3667	Scaphiopus_couchii
152	299676	26.2333	-98.3667	Scaphiopus_couchii
153	299677	26.2333	-98.3667	Scaphiopus_couchii
154	299678	26.2333	-98.3667	Scaphiopus_couchii
155	299672	26.2333	-98.3667	Scaphiopus_couchii
156	89831	26.2372	-98.3825	Hyla_squirella
157	7273	26.248	-98.5357	Gastrophyrne_olivacea
158	7271	26.248	-98.5357	Gastrophyrne_olivacea
159	7266	26.248	-98.5357	Gastrophyrne_olivacea
160	7269	26.248	-98.5357	Gastrophyrne_olivacea
161	7259	26.248	-98.5357	Gastrophyrne_olivacea
162	7262	26.248	-98.5357	Gastrophyrne_olivacea
163	7260	26.248	-98.5357	Gastrophyrne_olivacea
164	7261	26.248	-98.5357	Gastrophyrne_olivacea
165	7265	26.248	-98.5357	Gastrophyrne_olivacea
166	7272	26.248	-98.5357	Gastrophyrne_olivacea
167	7274	26.248	-98.5357	Gastrophyrne_olivacea
168	7267	26.248	-98.5357	Gastrophyrne_olivacea
169	7263	26.248	-98.5357	Gastrophyrne_olivacea
170	7270	26.248	-98.5357	Gastrophyrne_olivacea
171	7264	26.248	-98.5357	Gastrophyrne_olivacea
172	7268	26.248	-98.5357	Gastrophyrne_olivacea
173	66487	26.271	-98.4817	Scaphiopus_couchii
174	27760	26.2996	-98.4767	Rana_berlandieri
175	75102	26.3014	-98.1623	Gastrophyrne_olivacea
176	75120	26.3014	-98.1623	Hypopachus_variolosus
177	75120	26.3014	-98.1623	Rana_palustris
178	75120	26.3014	-98.1623	Rana_sphenocephala
179	73634	26.3015	-98.1786	Scaphiopus_couchii
180	2503	26.3018	-98.1625	Gastrophyrne_olivacea
181	2502	26.3068	-98.1737	Gastrophyrne_olivacea
182	2501	26.3068	-98.1737	Hypopachus_variolosus
183	2501	26.3068	-98.1737	Rana_palustris
184	2501	26.3068	-98.1737	Rana_sphenocephala
185	2496	26.3068	-98.1737	Scaphiopus_couchii
186	17948	26.3101	-98.3097	Rana_berlandieri
187	85079	26.3129	-98.0995	Scaphiopus_couchii
188	85078	26.3129	-98.0995	Scaphiopus_couchii
189	31903	26.3189	-98.3714	Rana_berlandieri
190	31951	26.3189	-98.3714	Scaphiopus_couchii
191	31952	26.3189	-98.3714	Scaphiopus_couchii
192	85082	26.3349	-98.2872	Scaphiopus_couchii
193	85089	26.3789	-98.8596	Scaphiopus_couchii
194	4933	26.3797	-98.8692	Scaphiopus_couchii
195	5000	26.3797	-98.8692	Scaphiopus_couchii
196	93167	26.3824	-98.6191	Rana_berlandieri
197	93168	26.3828	-98.625	Gastrophyrne_olivacea
198	32601	26.4	-98.164	Gastrophyrne_olivacea
199	32602	26.4	-98.164	Gastrophyrne_olivacea
200	93169	26.4023	-98.8521	Scaphiopus_couchii
201	93182	26.4621	-98.9332	Rhinophrynus_dorsalis
202	85090	26.4724	-98.8673	Scaphiopus_couchii
203	5065	26.4747	-98.9328	Rhinophrynus_dorsalis
204	2515	26.4777	-97.7775	Scaphiopus_couchii
205	2512	26.4777	-97.7775	Scaphiopus_couchii
206	2514	26.4777	-97.7775	Scaphiopus_couchii
207	2513	26.4777	-97.7775	Scaphiopus_couchii
208	36174	26.4837	-98.1333	Gastrophyrne_olivacea
209	36173	26.4837	-98.1333	Gastrophyrne_olivacea
210	36175	26.4837	-98.1333	Gastrophyrne_olivacea
211	36185	26.4837	-98.1333	Hypopachus_variolosus
212	36225	26.4837	-98.1333	Rana_berlandieri
213	36226	26.4837	-98.1333	Rana_berlandieri
214	36227	26.4837	-98.1333	Rana_berlandieri
215	36214	26.4837	-98.1333	Rana_catesbeiana
216	36215	26.4837	-98.1333	Rana_catesbeiana
217	36185	26.4837	-98.1333	Rana_palustris
218	36185	26.4837	-98.1333	Rana_sphenocephala
219	36234	26.4837	-98.1333	Scaphiopus_couchii
220	36235	26.4837	-98.1333	Scaphiopus_couchii
221	36237	26.4837	-98.1333	Scaphiopus_couchii
222	36236	26.4837	-98.1333	Scaphiopus_couchii
223	93181	26.4931	-98.9295	Rhinophrynus_dorsalis
224	5066	26.498	-98.9278	Rhinophrynus_dorsalis
225	13414	26.5	-100.18	Rana_berlandieri
226	93179	26.5012	-98.9269	Hypopachus_variolosus
227	93179	26.5012	-98.9269	Rana_palustris
228	93179	26.5012	-98.9269	Rana_sphenocephala
229	93171	26.5039	-98.8765	Rhinophrynus_dorsalis
230	5068	26.5103	-98.9199	Bufo_debilis
231	5067	26.5103	-98.9199	Rhinophrynus_dorsalis
232	93172	26.5222	-98.881	Rhinophrynus_dorsalis
233	93178	26.5332	-98.9155	Rhinophrynus_dorsalis
234	93177	26.5429	-98.9081	Rhinophrynus_dorsalis
235	17630	26.5653	-98.3697	Scaphiopus_couchii
236	17628	26.5653	-98.3697	Scaphiopus_couchii
237	17629	26.5653	-98.3697	Scaphiopus_couchii
238	17631	26.5653	-98.3697	Scaphiopus_couchii
239	93176	26.5655	-98.8787	Rhinophrynus_dorsalis
240	93175	26.5678	-98.8753	Hypopachus_variolosus
241	93175	26.5678	-98.8753	Rana_palustris
242	93175	26.5678	-98.8753	Rana_sphenocephala
243	93173	26.5678	-98.8753	Rhinophrynus_dorsalis
244	93174	26.5678	-98.8753	Rhinophrynus_dorsalis
245	93192	26.5729	-98.8718	Hyla_squirella
246	23319	26.6385	-99.153	Gastrophyrne_olivacea
247	93886	26.7053	-97.3291	Rana_berlandieri
248	93885	26.7056	-97.3289	Rana_berlandieri
249	0	26.7384	-98.8442	Anaxyrus_speciosus
250	3161	26.786	-97.775	Pseudacris_clarkii
251	3162	26.786	-97.775	Pseudacris_clarkii
252	3163	26.786	-97.775	Pseudacris_clarkii
253	3155	26.786	-97.775	Pseudacris_clarkii
254	3156	26.786	-97.775	Pseudacris_clarkii
255	3157	26.786	-97.775	Pseudacris_clarkii
256	3158	26.786	-97.775	Pseudacris_clarkii
257	3159	26.786	-97.775	Pseudacris_clarkii
258	3160	26.786	-97.775	Pseudacris_clarkii
259	3164	26.786	-97.775	Pseudacris_clarkii
260	4335	26.786	-97.775	Rana_berlandieri
261	4334	26.786	-97.775	Rana_berlandieri
262	85230	26.8894	-98.9993	Rana_berlandieri
263	85229	26.8894	-98.9993	Rana_berlandieri
264	93187	26.9033	-98.908	Hypopachus_variolosus
265	93187	26.9033	-98.908	Rana_palustris
266	93187	26.9033	-98.908	Rana_sphenocephala
267	93186	26.9036	-98.9087	Rhinophrynus_dorsalis
268	93185	26.9059	-98.9122	Hypopachus_variolosus
269	93185	26.9059	-98.9122	Rana_palustris
270	93185	26.9059	-98.9122	Rana_sphenocephala
271	0	26.91	-105.88	Anaxyrus_punctatus
272	0	26.91	-105.88	Anaxyrus_punctatus
273	0	26.91	-105.88	Anaxyrus_punctatus
274	0	26.91	-105.88	Anaxyrus_punctatus
275	0	26.91	-105.88	Anaxyrus_punctatus
276	4718	26.9245	-97.7915	Scaphiopus_hunterii
277	4719	26.9245	-97.7915	Scaphiopus_hunterii
278	62262	26.9358	-97.9878	Gastrophyrne_olivacea
279	62257	26.9358	-97.9878	Rana_berlandieri
280	62256	26.9358	-97.9878	Rana_berlandieri
281	34751	27.0258	-98.2061	Rana_berlandieri
282	34752	27.0258	-98.2061	Rana_berlandieri
283	34753	27.0258	-98.2061	Rana_berlandieri
284	192983	27.04	-105.24	Rana_berlandieri
285	45309	27.0667	-105.633	Scaphiopus_couchii
286	45310	27.0667	-105.633	Scaphiopus_couchii
287	45307	27.1167	-105.567	Scaphiopus_couchii
288	45308	27.1167	-105.567	Scaphiopus_couchii
289	45311	27.1167	-105.567	Scaphiopus_couchii
290	0	27.1336	-98.9327	Anaxyrus_speciosus
291	20844	27.1536	-98.3211	Rana_berlandieri
292	20845	27.1536	-98.3211	Rana_berlandieri
293	20846	27.1536	-98.3211	Rana_berlandieri
294	20847	27.1536	-98.3211	Rana_berlandieri
295	20848	27.1536	-98.3211	Rana_berlandieri
296	20849	27.1536	-98.3211	Rana_berlandieri
297	20850	27.1536	-98.3211	Rana_berlandieri
298	20851	27.1536	-98.3211	Rana_berlandieri
299	20852	27.1536	-98.3211	Rana_berlandieri
300	20853	27.1536	-98.3211	Rana_berlandieri
301	20843	27.1536	-98.3211	Scaphiopus_couchii
302	20841	27.1536	-98.3211	Scaphiopus_couchii
303	20842	27.1536	-98.3211	Scaphiopus_couchii
304	0	27.1745	-98.2476	Anaxyrus_speciosus
305	86304	27.1918	-98.934	Rana_berlandieri
306	79393	27.225	-98.145	Rana_berlandieri
307	0	27.2273	-98.0797	Anaxyrus_speciosus
308	0	27.2273	-98.0797	Anaxyrus_speciosus
309	29983	27.2453	-99.44	Rana_berlandieri
310	29982	27.2453	-99.44	Rana_berlandieri
311	29984	27.2453	-99.44	Rana_berlandieri
312	29985	27.2453	-99.44	Rana_berlandieri
313	80085	27.2772	-98.7	Rana_berlandieri
314	80109	27.2778	-98.7275	Scaphiopus_couchii
315	80110	27.2856	-98.9594	Gastrophyrne_olivacea
316	0	27.3062	-98.2091	Anaxyrus_speciosus
317	0	27.363	-98.9814	Anaxyrus_speciosus
318	52006	27.3833	-105.767	Anaxryus_woodhousii
319	52005	27.3833	-105.767	Anaxryus_woodhousii
320	52007	27.3833	-105.767	Anaxryus_woodhousii
321	93884	27.4287	-97.2984	Pseudacris_clarkii
322	12161	27.44	-107.49	Spea_multiplicata
323	12159	27.44	-107.49	Spea_multiplicata
324	12162	27.44	-107.49	Spea_multiplicata
325	12160	27.44	-107.49	Spea_multiplicata
326	12158	27.44	-107.49	Spea_multiplicata
327	0	27.4556	-99.0417	Anaxyrus_speciosus
328	93887	27.476	-97.283	Rana_berlandieri
329	13672	27.5155	-97.9377	Rana_berlandieri
330	0	27.5159	-97.8561	Scaphiopus_couchii
331	0	27.5159	-97.8561	Scaphiopus_couchii
332	5350	27.5165	-97.8563	Hypopachus_variolosus
333	5351	27.5165	-97.8563	Hypopachus_variolosus
334	5883	27.5165	-97.8563	Hypopachus_variolosus
335	5885	27.5165	-97.8563	Hypopachus_variolosus
336	5888	27.5165	-97.8563	Hypopachus_variolosus
337	5889	27.5165	-97.8563	Hypopachus_variolosus
338	5884	27.5165	-97.8563	Hypopachus_variolosus
339	5886	27.5165	-97.8563	Hypopachus_variolosus
340	5887	27.5165	-97.8563	Hypopachus_variolosus
341	5350	27.5165	-97.8563	Rana_palustris
342	5351	27.5165	-97.8563	Rana_palustris
343	5883	27.5165	-97.8563	Rana_palustris
344	5885	27.5165	-97.8563	Rana_palustris
345	5888	27.5165	-97.8563	Rana_palustris
346	5889	27.5165	-97.8563	Rana_palustris
347	5884	27.5165	-97.8563	Rana_palustris
348	5886	27.5165	-97.8563	Rana_palustris
349	5887	27.5165	-97.8563	Rana_palustris
350	5350	27.5165	-97.8563	Rana_sphenocephala
351	5351	27.5165	-97.8563	Rana_sphenocephala
352	5883	27.5165	-97.8563	Rana_sphenocephala
353	5885	27.5165	-97.8563	Rana_sphenocephala
354	5888	27.5165	-97.8563	Rana_sphenocephala
355	5889	27.5165	-97.8563	Rana_sphenocephala
356	5884	27.5165	-97.8563	Rana_sphenocephala
357	5886	27.5165	-97.8563	Rana_sphenocephala
358	5887	27.5165	-97.8563	Rana_sphenocephala
359	128789	27.52	-100.62	Rana_berlandieri
360	128792	27.52	-100.62	Rana_berlandieri
361	128790	27.52	-100.62	Rana_berlandieri
362	128791	27.52	-100.62	Rana_berlandieri
363	38343	27.5333	-100.617	Rana_berlandieri
364	7118	27.5361	-99.4694	Scaphiopus_couchii
365	135354	27.55	-105.36	Bufo_debilis
366	0	27.5592	-98.8465	Anaxyrus_speciosus
367	0	27.609	-99.0595	Anaxyrus_speciosus
368	63442	27.6198	-98.221	Bufo_debilis
369	63443	27.6198	-98.221	Bufo_debilis
370	63455	27.6198	-98.221	Gastrophyrne_olivacea
371	63453	27.6198	-98.221	Hypopachus_variolosus
372	63454	27.6198	-98.221	Hypopachus_variolosus
373	63452	27.6198	-98.221	Hypopachus_variolosus
374	63450	27.6198	-98.221	Rana_berlandieri
375	63451	27.6198	-98.221	Rana_berlandieri
376	63453	27.6198	-98.221	Rana_palustris
377	63454	27.6198	-98.221	Rana_palustris
378	63452	27.6198	-98.221	Rana_palustris
379	63453	27.6198	-98.221	Rana_sphenocephala
380	63454	27.6198	-98.221	Rana_sphenocephala
381	63452	27.6198	-98.221	Rana_sphenocephala
382	63448	27.6198	-98.221	Scaphiopus_couchii
383	63447	27.6198	-98.221	Scaphiopus_couchii
384	63449	27.6198	-98.221	Scaphiopus_couchii
385	44107	27.65	-107.63	Spea_multiplicata
386	44109	27.65	-107.63	Spea_multiplicata
387	44110	27.65	-107.63	Spea_multiplicata
388	44108	27.65	-107.63	Spea_multiplicata
389	0	27.6714	-98.8359	Anaxyrus_speciosus
390	12686	27.6803	-99.507	Rana_berlandieri
391	12687	27.6803	-99.507	Rana_berlandieri
392	12688	27.6803	-99.507	Rana_berlandieri
393	27720	27.7	-105.183	Anaxryus_woodhousii
394	27721	27.7	-105.183	Anaxryus_woodhousii
395	27719	27.7	-105.183	Anaxryus_woodhousii
396	34598	27.7007	-98.5015	Scaphiopus_couchii
397	34600	27.7007	-98.5015	Scaphiopus_couchii
398	34601	27.7007	-98.5015	Scaphiopus_couchii
399	34605	27.7007	-98.5015	Scaphiopus_couchii
400	34607	27.7007	-98.5015	Scaphiopus_couchii
401	34608	27.7007	-98.5015	Scaphiopus_couchii
402	34609	27.7007	-98.5015	Scaphiopus_couchii
403	34610	27.7007	-98.5015	Scaphiopus_couchii
404	34611	27.7007	-98.5015	Scaphiopus_couchii
405	34612	27.7007	-98.5015	Scaphiopus_couchii
406	34613	27.7007	-98.5015	Scaphiopus_couchii
407	34618	27.7007	-98.5015	Scaphiopus_couchii
408	34620	27.7007	-98.5015	Scaphiopus_couchii
409	34621	27.7007	-98.5015	Scaphiopus_couchii
410	34624	27.7007	-98.5015	Scaphiopus_couchii
411	34626	27.7007	-98.5015	Scaphiopus_couchii
412	34628	27.7007	-98.5015	Scaphiopus_couchii
413	34632	27.7007	-98.5015	Scaphiopus_couchii
414	34633	27.7007	-98.5015	Scaphiopus_couchii
415	34634	27.7007	-98.5015	Scaphiopus_couchii
416	34636	27.7007	-98.5015	Scaphiopus_couchii
417	34637	27.7007	-98.5015	Scaphiopus_couchii
418	34643	27.7007	-98.5015	Scaphiopus_couchii
419	34645	27.7007	-98.5015	Scaphiopus_couchii
420	34646	27.7007	-98.5015	Scaphiopus_couchii
421	34647	27.7007	-98.5015	Scaphiopus_couchii
422	34649	27.7007	-98.5015	Scaphiopus_couchii
423	34650	27.7007	-98.5015	Scaphiopus_couchii
424	34594	27.7007	-98.5015	Scaphiopus_couchii
425	34595	27.7007	-98.5015	Scaphiopus_couchii
426	34596	27.7007	-98.5015	Scaphiopus_couchii
427	34597	27.7007	-98.5015	Scaphiopus_couchii
428	34599	27.7007	-98.5015	Scaphiopus_couchii
429	34602	27.7007	-98.5015	Scaphiopus_couchii
430	34603	27.7007	-98.5015	Scaphiopus_couchii
431	34604	27.7007	-98.5015	Scaphiopus_couchii
432	34606	27.7007	-98.5015	Scaphiopus_couchii
433	34614	27.7007	-98.5015	Scaphiopus_couchii
434	34615	27.7007	-98.5015	Scaphiopus_couchii
435	34616	27.7007	-98.5015	Scaphiopus_couchii
436	34617	27.7007	-98.5015	Scaphiopus_couchii
437	34619	27.7007	-98.5015	Scaphiopus_couchii
438	34622	27.7007	-98.5015	Scaphiopus_couchii
439	34623	27.7007	-98.5015	Scaphiopus_couchii
440	34625	27.7007	-98.5015	Scaphiopus_couchii
441	34627	27.7007	-98.5015	Scaphiopus_couchii
442	34629	27.7007	-98.5015	Scaphiopus_couchii
443	34630	27.7007	-98.5015	Scaphiopus_couchii
444	34631	27.7007	-98.5015	Scaphiopus_couchii
445	34635	27.7007	-98.5015	Scaphiopus_couchii
446	34638	27.7007	-98.5015	Scaphiopus_couchii
447	34639	27.7007	-98.5015	Scaphiopus_couchii
448	34640	27.7007	-98.5015	Scaphiopus_couchii
449	34641	27.7007	-98.5015	Scaphiopus_couchii
450	34642	27.7007	-98.5015	Scaphiopus_couchii
451	34644	27.7007	-98.5015	Scaphiopus_couchii
452	34648	27.7007	-98.5015	Scaphiopus_couchii
453	30124	27.7212	-98.0956	Gastrophyrne_olivacea
454	30265	27.7212	-98.0956	Gastrophyrne_olivacea
455	30723	27.7522	-98.0697	Anaxyrus_speciosus
456	30720	27.7522	-98.0697	Gastrophyrne_olivacea
457	30721	27.7522	-98.0697	Scaphiopus_couchii
458	30722	27.7522	-98.0697	Scaphiopus_couchii
459	39858	27.76	-100.93	Rana_berlandieri
460	59316	27.76	-105.16	Scaphiopus_couchii
461	30731	27.7639	-98.2389	Anaxyrus_speciosus
462	30732	27.7639	-98.2389	Anaxyrus_speciosus
463	30112	27.7639	-98.2389	Scaphiopus_couchii
464	30123	27.7723	-98.272	Gastrophyrne_olivacea
465	30063	27.7723	-98.272	Hypopachus_variolosus
466	30064	27.7723	-98.272	Hypopachus_variolosus
467	30065	27.7723	-98.272	Hypopachus_variolosus
468	30061	27.7723	-98.272	Hypopachus_variolosus
469	30062	27.7723	-98.272	Hypopachus_variolosus
470	30063	27.7723	-98.272	Rana_palustris
471	30064	27.7723	-98.272	Rana_palustris
472	30065	27.7723	-98.272	Rana_palustris
473	30061	27.7723	-98.272	Rana_palustris
474	30062	27.7723	-98.272	Rana_palustris
475	30063	27.7723	-98.272	Rana_sphenocephala
476	30064	27.7723	-98.272	Rana_sphenocephala
477	30065	27.7723	-98.272	Rana_sphenocephala
478	30061	27.7723	-98.272	Rana_sphenocephala
479	30062	27.7723	-98.272	Rana_sphenocephala
480	794	27.8083	-98.0143	Bufo_debilis
481	796	27.8083	-98.0143	Bufo_debilis
482	797	27.8083	-98.0143	Bufo_debilis
483	798	27.8083	-98.0143	Bufo_debilis
484	795	27.8083	-98.0143	Bufo_debilis
485	90412	27.8257	-98.263	Hypopachus_variolosus
486	90412	27.8257	-98.263	Rana_palustris
487	90412	27.8257	-98.263	Rana_sphenocephala
488	48779	27.848	-101.117	Scaphiopus_couchii
489	47121	27.8797	-97.3136	Scaphiopus_couchii
490	0	27.8824	-98.6275	Anaxyrus_speciosus
491	79005	27.9465	-98.6188	Rana_berlandieri
492	79006	27.9465	-98.6188	Rana_berlandieri
493	79004	27.9465	-98.6188	Rana_berlandieri
494	79007	27.9465	-98.6188	Rana_berlandieri
495	114485	27.97	-107.6	Smilisca_baudinii
496	114486	27.97	-107.6	Smilisca_baudinii
497	121484	28.01	-105.31	Rana_berlandieri
498	39258	28.0137	-97.0585	Gastrophyrne_olivacea
499	38694	28.0137	-97.0585	Pseudacris_clarkii
500	39257	28.0137	-97.0585	Pseudacris_clarkii
501	0	28.0154	-97.236	Anaxyrus_speciosus
502	39255	28.0307	-97.0534	Pseudacris_clarkii
503	36613	28.0393	-99.5081	Scaphiopus_couchii
504	22746	28.0405	-97.4967	Pseudacris_clarkii
505	22745	28.0405	-97.4967	Rana_berlandieri
506	370	28.0456	-99.219	Bufo_debilis
507	368	28.0456	-99.219	Gastrophyrne_olivacea
508	369	28.0456	-99.219	Gastrophyrne_olivacea
509	2147	28.0456	-99.219	Rana_berlandieri
510	358	28.0456	-99.219	Rana_berlandieri
511	359	28.0456	-99.219	Rana_berlandieri
512	360	28.0456	-99.219	Rana_berlandieri
513	362	28.0456	-99.219	Rana_berlandieri
514	366	28.0456	-99.219	Rana_berlandieri
515	367	28.0456	-99.219	Rana_berlandieri
516	357	28.0456	-99.219	Rana_berlandieri
517	361	28.0456	-99.219	Rana_berlandieri
518	363	28.0456	-99.219	Rana_berlandieri
519	364	28.0456	-99.219	Rana_berlandieri
520	365	28.0456	-99.219	Rana_berlandieri
521	75190	28.0463	-99.35	Gastrophyrne_olivacea
522	0	28.05	-108.467	Anaxyrus_punctatus
523	6371	28.0971	-97.4383	Acris_creptians
524	7348	28.0971	-97.4383	Rana_catesbeiana
525	7347	28.0971	-97.4383	Rana_catesbeiana
526	7346	28.0971	-97.4383	Rana_catesbeiana
527	193088	28.1069	-97.5257	Hyla_chrysoscelis
528	193084	28.1069	-97.5257	Hyla_chrysoscelis
529	193086	28.1069	-97.5257	Hyla_chrysoscelis
530	193090	28.1069	-97.5257	Hyla_chrysoscelis
531	193083	28.1069	-97.5257	Hyla_chrysoscelis
532	193089	28.1069	-97.5257	Hyla_chrysoscelis
533	193091	28.1069	-97.5257	Hyla_chrysoscelis
534	193087	28.1069	-97.5257	Hyla_chrysoscelis
535	193082	28.1069	-97.5257	Hyla_chrysoscelis
536	193085	28.1069	-97.5257	Hyla_chrysoscelis
537	0	28.1071	-97.3679	Anaxyrus_speciosus
538	0	28.1071	-97.3679	Gastrophyrne_olivacea
539	14696	28.1193	-97.4451	Gastrophyrne_olivacea
540	14697	28.1193	-97.4451	Gastrophyrne_olivacea
541	14698	28.1193	-97.4451	Gastrophyrne_olivacea
542	14699	28.1193	-97.4451	Gastrophyrne_olivacea
543	17886	28.127	-97.4317	Gastrophyrne_olivacea
544	17889	28.127	-97.4317	Gastrophyrne_olivacea
545	17890	28.127	-97.4317	Gastrophyrne_olivacea
546	17891	28.127	-97.4317	Gastrophyrne_olivacea
547	20291	28.127	-97.4317	Gastrophyrne_olivacea
548	20292	28.127	-97.4317	Gastrophyrne_olivacea
549	20293	28.127	-97.4317	Gastrophyrne_olivacea
550	20296	28.127	-97.4317	Rana_berlandieri
551	13321	28.127	-97.4317	Scaphiopus_couchii
552	13322	28.127	-97.4317	Scaphiopus_couchii
553	13392	28.1338	-97.4184	Bufo_debilis
554	13393	28.1338	-97.4184	Bufo_debilis
555	14712	28.1338	-97.4184	Gastrophyrne_olivacea
556	14713	28.1338	-97.4184	Gastrophyrne_olivacea
557	14706	28.1338	-97.4184	Gastrophyrne_olivacea
558	14714	28.1338	-97.4184	Gastrophyrne_olivacea
559	13639	28.1338	-97.4184	Pseudacris_clarkii
560	13312	28.1338	-97.4184	Scaphiopus_couchii
561	13314	28.1338	-97.4184	Scaphiopus_couchii
562	13311	28.1338	-97.4184	Scaphiopus_couchii
563	13313	28.1338	-97.4184	Scaphiopus_couchii
564	13320	28.1338	-97.4184	Scaphiopus_couchii
565	4768	28.1415	-96.9976	Scaphiopus_hunterii
566	30974	28.1673	-97.6856	Scaphiopus_couchii
567	10487	28.1711	-98.1824	Rana_berlandieri
568	10436	28.1711	-98.1824	Scaphiopus_couchii
569	10439	28.1711	-98.1824	Scaphiopus_couchii
570	10440	28.1711	-98.1824	Scaphiopus_couchii
571	10437	28.1711	-98.1824	Scaphiopus_couchii
572	10438	28.1711	-98.1824	Scaphiopus_couchii
573	144481	28.1712	-97.7562	Gastrophyrne_olivacea
574	47228	28.2	-108.15	Smilisca_baudinii
575	7042	28.2029	-101.1	Scaphiopus_couchii
576	0	28.2073	-98.5704	Anaxyrus_speciosus
577	59274	28.22	-104.58	Gastrophyrne_olivacea
578	10484	28.2256	-98.4503	Rana_berlandieri
579	10483	28.2256	-98.4503	Rana_berlandieri
580	10478	28.2358	-98.4387	Gastrophyrne_olivacea
581	39784	28.24	-100.41	Anaxyrus_speciosus
582	90013	28.2478	-97.1537	Gastrophyrne_olivacea
583	20039	28.2487	-97.335	Bufo_debilis
584	20036	28.2487	-97.335	Gastrophyrne_olivacea
585	20037	28.2487	-97.335	Gastrophyrne_olivacea
586	13404	28.251	-97.3385	Bufo_debilis
587	52352	28.254	-97.6686	Scaphiopus_couchii
588	10431	28.2561	-98.4152	Scaphiopus_couchii
589	10441	28.2561	-98.4152	Scaphiopus_couchii
590	10428	28.2561	-98.4152	Scaphiopus_couchii
591	10429	28.2561	-98.4152	Scaphiopus_couchii
592	10430	28.2561	-98.4152	Scaphiopus_couchii
593	52355	28.2845	-97.602	Acris_creptians
594	52354	28.2845	-97.602	Acris_creptians
595	52356	28.2845	-97.602	Acris_creptians
596	52357	28.2846	-97.6017	Acris_creptians
597	30958	28.2863	-97.6157	Rana_berlandieri
598	3048	28.3101	-96.8039	Gastrophyrne_olivacea
599	4294	28.3101	-96.8039	Psuedacris_streckeri
600	4295	28.3101	-96.8039	Psuedacris_streckeri
601	4297	28.3101	-96.8039	Psuedacris_streckeri
602	4299	28.3101	-96.8039	Psuedacris_streckeri
603	4300	28.3101	-96.8039	Psuedacris_streckeri
604	4301	28.3101	-96.8039	Psuedacris_streckeri
605	4303	28.3101	-96.8039	Psuedacris_streckeri
606	4306	28.3101	-96.8039	Psuedacris_streckeri
607	4307	28.3101	-96.8039	Psuedacris_streckeri
608	4308	28.3101	-96.8039	Psuedacris_streckeri
609	4309	28.3101	-96.8039	Psuedacris_streckeri
610	4312	28.3101	-96.8039	Psuedacris_streckeri
611	4313	28.3101	-96.8039	Psuedacris_streckeri
612	4315	28.3101	-96.8039	Psuedacris_streckeri
613	1090	28.3101	-96.8039	Psuedacris_streckeri
614	4290	28.3101	-96.8039	Psuedacris_streckeri
615	4291	28.3101	-96.8039	Psuedacris_streckeri
616	4292	28.3101	-96.8039	Psuedacris_streckeri
617	4293	28.3101	-96.8039	Psuedacris_streckeri
618	4296	28.3101	-96.8039	Psuedacris_streckeri
619	4298	28.3101	-96.8039	Psuedacris_streckeri
620	4302	28.3101	-96.8039	Psuedacris_streckeri
621	4304	28.3101	-96.8039	Psuedacris_streckeri
622	4305	28.3101	-96.8039	Psuedacris_streckeri
623	4310	28.3101	-96.8039	Psuedacris_streckeri
624	4311	28.3101	-96.8039	Psuedacris_streckeri
625	4314	28.3101	-96.8039	Psuedacris_streckeri
626	2882	28.3101	-96.8039	Rana_berlandieri
627	2883	28.3101	-96.8039	Rana_berlandieri
628	2884	28.3101	-96.8039	Rana_berlandieri
629	2181	28.3101	-96.8039	Rana_berlandieri
630	2187	28.3101	-96.8039	Rana_berlandieri
631	2881	28.3101	-96.8039	Rana_berlandieri
632	80578	28.3276	-99.0814	Scaphiopus_couchii
633	80576	28.3276	-99.0814	Scaphiopus_couchii
634	80577	28.3276	-99.0814	Scaphiopus_couchii
635	73635	28.3326	-98.0518	Scaphiopus_couchii
636	73637	28.3326	-98.0518	Scaphiopus_couchii
637	73636	28.3326	-98.0518	Scaphiopus_couchii
638	5074	28.3327	-98.1175	Scaphiopus_couchii
639	5076	28.3327	-98.1175	Scaphiopus_couchii
640	5075	28.3327	-98.1175	Scaphiopus_couchii
641	9296	28.3327	-98.1175	Scaphiopus_couchii
642	38701	28.3333	-99.1205	Gastrophyrne_olivacea
643	33830	28.3333	-105.417	Anaxryus_woodhousii
644	33834	28.3333	-105.417	Anaxryus_woodhousii
645	33831	28.3333	-105.417	Anaxryus_woodhousii
646	33832	28.3333	-105.417	Anaxryus_woodhousii
647	33833	28.3333	-105.417	Anaxryus_woodhousii
648	33835	28.3333	-105.417	Anaxryus_woodhousii
649	34508	28.3398	-97.2841	Gastrophyrne_olivacea
650	34507	28.3398	-97.2841	Gastrophyrne_olivacea
651	58722	28.3443	-106.843	Spea_multiplicata
652	80581	28.3477	-99.0702	Scaphiopus_couchii
653	80582	28.3477	-99.0256	Scaphiopus_couchii
654	80579	28.3478	-99.075	Scaphiopus_couchii
655	80580	28.3478	-99.075	Scaphiopus_couchii
656	5098	28.3485	-97.7206	Gastrophyrne_olivacea
657	45709	28.35	-106.367	Anaxryus_woodhousii
658	59242	28.35	-104.54	Bufo_debilis
659	59243	28.35	-104.54	Bufo_debilis
660	80586	28.356	-98.9997	Scaphiopus_couchii
661	80575	28.359	-98.9997	Rana_berlandieri
662	80583	28.359	-98.9997	Scaphiopus_couchii
663	80584	28.359	-98.9997	Scaphiopus_couchii
664	39782	28.36	-100.57	Anaxyrus_speciosus
665	39783	28.36	-100.57	Anaxyrus_speciosus
666	39859	28.36	-100.57	Rana_berlandieri
667	5359	28.3709	-97.784	Gastrophyrne_olivacea
668	5358	28.3709	-97.784	Gastrophyrne_olivacea
669	5077	28.3761	-98.1175	Scaphiopus_couchii
670	5078	28.3761	-98.1175	Scaphiopus_couchii
671	13140	28.3919	-98.163	Scaphiopus_couchii
672	58721	28.3948	-106.96	Spea_multiplicata
673	5079	28.4016	-97.8313	Scaphiopus_couchii
674	5080	28.4016	-97.8313	Scaphiopus_couchii
675	93074	28.4088	-97.7297	Eleutherodactylus_cystignathoid
676	13671	28.4159	-99.2354	Rana_berlandieri
677	47223	28.4167	-107.433	Spea_multiplicata
678	5352	28.4221	-97.7723	Hypopachus_variolosus
679	5352	28.4221	-97.7723	Rana_palustris
680	5352	28.4221	-97.7723	Rana_sphenocephala
681	10433	28.4316	-98.1824	Scaphiopus_couchii
682	10435	28.4316	-98.1824	Scaphiopus_couchii
683	10432	28.4316	-98.1824	Scaphiopus_couchii
684	10434	28.4316	-98.1824	Scaphiopus_couchii
685	372	28.4369	-99.2352	Scaphiopus_couchii
686	52076	28.45	-107.45	Anaxyrus_speciosus
687	52077	28.45	-107.45	Anaxyrus_speciosus
688	52078	28.45	-107.45	Anaxyrus_speciosus
689	52036	28.45	-107.45	Anaxryus_woodhousii
690	52049	28.45	-107.45	Anaxryus_woodhousii
691	52043	28.45	-107.45	Anaxryus_woodhousii
692	52044	28.45	-107.45	Anaxryus_woodhousii
693	52050	28.45	-107.45	Anaxryus_woodhousii
694	52107	28.45	-107.45	Spea_multiplicata
695	52108	28.45	-107.45	Spea_multiplicata
696	52105	28.45	-107.45	Spea_multiplicata
697	52106	28.45	-107.45	Spea_multiplicata
698	52109	28.45	-107.45	Spea_multiplicata
699	13673	28.4626	-98.5505	Rana_berlandieri
700	13674	28.4705	-98.1969	Rana_berlandieri
701	0	28.482	-98.348	Anaxyrus_punctatus
702	12689	28.4831	-97.6551	Rana_berlandieri
703	13947	28.4872	-96.8522	Gastrophryne_carolinensis
704	13948	28.4872	-96.8522	Gastrophryne_carolinensis
705	82707	28.4943	-98.7372	Rana_berlandieri
706	52111	28.5167	-106.7	Spea_multiplicata
707	52113	28.5167	-106.7	Spea_multiplicata
708	52112	28.5167	-106.7	Spea_multiplicata
709	79735	28.5183	-97.1953	Rana_areolata
710	0	28.52	-107.3	Anaxryus_woodhousii
711	0	28.52	-107.3	Anaxryus_woodhousii
712	0	28.52	-107.3	Anaxryus_woodhousii
713	80587	28.5226	-99.0418	Scaphiopus_couchii
714	176829	28.528	-99.759	Rana_berlandieri
715	91813	28.5424	-96.6266	Rana_catesbeiana
716	204376	28.5493	-99.7522	Rana_berlandieri
717	204377	28.5493	-99.7522	Rana_berlandieri
718	204378	28.5493	-99.7522	Rana_berlandieri
719	59327	28.55	-106.16	Spea_multiplicata
720	59328	28.55	-106.16	Spea_multiplicata
721	91812	28.553	-96.6354	Rana_catesbeiana
722	33797	28.5667	-103.52	Rana_berlandieri
723	44426	28.5833	-106.117	Anaxyrus_punctatus
724	44427	28.5833	-106.117	Anaxyrus_punctatus
725	44428	28.5833	-106.117	Anaxyrus_punctatus
726	44429	28.5833	-106.117	Anaxyrus_punctatus
727	44388	28.5833	-106.117	Scaphiopus_couchii
728	59305	28.59	-106.1	Scaphiopus_couchii
729	0	28.5907	-98.3452	Anaxyrus_speciosus
730	59285	28.6	-105.99	Rana_berlandieri
731	59288	28.6	-105.99	Rana_berlandieri
732	59287	28.6	-105.99	Rana_berlandieri
733	59289	28.6	-105.99	Rana_berlandieri
734	59300	28.6	-105.99	Scaphiopus_couchii
735	92037	28.6057	-96.8561	Gastrophyrne_olivacea
736	92080	28.6057	-96.8561	Hyla_squirella
737	92079	28.6057	-96.8561	Hyla_squirella
738	92081	28.6057	-96.8561	Hyla_squirella
739	188177	28.6314	-100.122	Rana_catesbeiana
740	188178	28.6314	-100.122	Rana_catesbeiana
741	45322	28.6333	-107.6	Anaxryus_woodhousii
742	0	28.6362	-98.9431	Anaxyrus_speciosus
743	63803	28.6389	-98.5489	Gastrophyrne_olivacea
744	0	28.6435	-97.7536	Anaxyrus_speciosus
745	0	28.6437	-97.8209	Gastrophyrne_olivacea
746	0	28.6437	-97.8209	Gastrophyrne_olivacea
747	0	28.6437	-97.8209	Hyla_chrysoscelis
748	0	28.6437	-97.8209	Hyla_chrysoscelis
749	0	28.646	-97.8706	Hyla_chrysoscelis
750	2282	28.6698	-96.5435	Acris_creptians
751	2281	28.6698	-96.5435	Acris_creptians
752	39860	28.68	-100.55	Rana_berlandieri
753	39862	28.68	-100.55	Rana_berlandieri
754	39861	28.68	-100.55	Rana_berlandieri
755	39867	28.68	-100.55	Rana_berlandieri
756	61764	28.7	-100.93	Gastrophyrne_olivacea
757	0	28.7	-106.13	Scaphiopus_couchii
758	0	28.7	-106.13	Scaphiopus_couchii
759	0	28.7	-106.13	Scaphiopus_couchii
760	0	28.7	-106.13	Scaphiopus_couchii
761	92036	28.7023	-96.9471	Gastrophyrne_olivacea
762	52840	28.7029	-97.3877	Rana_catesbeiana
763	14039	28.7089	-100.49	Gastrophyrne_olivacea
764	14040	28.7089	-100.49	Gastrophyrne_olivacea
765	52110	28.71	-106.91	Spea_multiplicata
766	0	28.7109	-98.0622	Anaxyrus_speciosus
767	34589	28.7157	-98.5483	Scaphiopus_couchii
768	59301	28.72	-106	Scaphiopus_couchii
769	59302	28.72	-106	Scaphiopus_couchii
770	92078	28.7221	-96.9525	Hyla_squirella
771	0	28.7268	-98.0061	Anaxyrus_speciosus
772	0	28.7281	-98.253	Anaxyrus_speciosus
773	52023	28.7398	-97.387	Gastrophyrne_olivacea
774	51937	28.7398	-97.387	Hypopachus_variolosus
775	51937	28.7398	-97.387	Rana_palustris
776	51937	28.7398	-97.387	Rana_sphenocephala
777	4733	28.7474	-98.254	Gastrophyrne_olivacea
778	4734	28.7474	-98.254	Gastrophyrne_olivacea
779	4762	28.7474	-98.254	Rana_berlandieri
780	0	28.75	-106.183	Anaxyrus_punctatus
781	240084	28.765	-97.7858	Rana_berlandieri
782	51949	28.7667	-106.167	Anaxyrus_punctatus
783	0	28.7667	-106.067	Scaphiopus_couchii
784	0	28.7703	-99.6047	Anaxyrus_speciosus
785	64743	28.7755	-99.8367	Rana_berlandieri
786	94345	28.777	-99.6244	Scaphiopus_couchii
787	20034	28.7827	-97.3887	Gastrophyrne_olivacea
788	20035	28.7827	-97.3887	Gastrophyrne_olivacea
789	63963	28.7837	-99.245	Rana_berlandieri
790	63962	28.7837	-99.245	Rana_berlandieri
791	63964	28.7837	-99.245	Rana_berlandieri
792	63972	28.7872	-99.3203	Gastrophyrne_olivacea
793	63976	28.7872	-99.3203	Scaphiopus_couchii
794	63978	28.7872	-99.3203	Scaphiopus_couchii
795	63973	28.7872	-99.3203	Scaphiopus_couchii
796	63974	28.7872	-99.3203	Scaphiopus_couchii
797	63975	28.7872	-99.3203	Scaphiopus_couchii
798	63977	28.7872	-99.3203	Scaphiopus_couchii
799	0	28.82	-106.14	Anaxyrus_punctatus
800	200530	28.8357	-97.6638	Rana_berlandieri
801	200528	28.8357	-97.6638	Rana_berlandieri
802	200529	28.8357	-97.6638	Rana_berlandieri
803	200531	28.852	-97.6765	Rana_berlandieri
804	64746	28.8628	-99.75	Rana_berlandieri
805	64741	28.8628	-99.75	Rana_berlandieri
806	64744	28.8628	-99.75	Rana_berlandieri
807	64745	28.8628	-99.75	Rana_berlandieri
808	64755	28.8628	-99.75	Scaphiopus_couchii
809	59229	28.88	-105.82	Bufo_debilis
810	59232	28.88	-105.82	Bufo_debilis
811	59228	28.88	-105.82	Bufo_debilis
812	59230	28.88	-105.82	Bufo_debilis
813	59231	28.88	-105.82	Bufo_debilis
814	0	28.894	-99.6043	Anaxyrus_speciosus
815	82351	28.8956	-97.6853	Rana_catesbeiana
816	59303	28.9	-105.73	Scaphiopus_couchii
817	80588	28.9106	-100.277	Gastrophyrne_olivacea
818	80589	28.9106	-100.277	Gastrophyrne_olivacea
819	80590	28.9106	-100.277	Gastrophyrne_olivacea
820	33505	28.95	-101.97	Rana_berlandieri
821	49050	28.9674	-100.305	Bufo_debilis
822	49051	28.9674	-100.305	Bufo_debilis
823	49039	28.9674	-100.305	Rana_berlandieri
824	63761	28.9674	-100.305	Rana_berlandieri
825	63762	28.9674	-100.305	Rana_berlandieri
826	63764	28.9674	-100.305	Rana_berlandieri
827	63767	28.9674	-100.305	Rana_berlandieri
828	63768	28.9674	-100.305	Rana_berlandieri
829	63769	28.9674	-100.305	Rana_berlandieri
830	63771	28.9674	-100.305	Rana_berlandieri
831	63760	28.9674	-100.305	Rana_berlandieri
832	63763	28.9674	-100.305	Rana_berlandieri
833	63765	28.9674	-100.305	Rana_berlandieri
834	63766	28.9674	-100.305	Rana_berlandieri
835	63770	28.9674	-100.305	Rana_berlandieri
836	58315	28.978	-102.552	Rana_berlandieri
837	58316	28.978	-102.552	Rana_berlandieri
838	58317	28.978	-102.552	Rana_berlandieri
839	58318	28.978	-102.552	Rana_berlandieri
840	22882	28.9785	-97.2087	Rana_catesbeiana
841	22884	28.9785	-97.2087	Rana_catesbeiana
842	22880	28.9785	-97.2087	Rana_catesbeiana
843	22881	28.9785	-97.2087	Rana_catesbeiana
844	22883	28.9785	-97.2087	Rana_catesbeiana
845	22885	28.9785	-97.2087	Rana_catesbeiana
846	22886	28.9785	-97.2087	Rana_catesbeiana
847	22887	28.9785	-97.2087	Rana_catesbeiana
848	136517	28.9789	-109.398	Scaphiopus_couchii
849	136518	28.9789	-109.398	Scaphiopus_couchii
850	136513	28.9797	-109.629	Gastrophyrne_olivacea
851	136514	28.9797	-109.629	Gastrophyrne_olivacea
852	136515	28.9797	-109.629	Gastrophyrne_olivacea
853	136516	28.9797	-109.629	Gastrophyrne_olivacea
854	136521	28.9797	-109.629	Scaphiopus_couchii
855	136519	28.9797	-109.629	Scaphiopus_couchii
856	136520	28.9797	-109.629	Scaphiopus_couchii
857	90820	28.98	-109.63	Scaphiopus_couchii
858	17827	28.9811	-97.5028	Hyla_chrysoscelis
859	59319	28.99	-104.5	Spea_multiplicata
860	63911	28.9964	-100.305	Rana_berlandieri
861	425785	29	-102.467	Scaphiopus_couchii
862	80591	29.0216	-100.164	Gastrophyrne_olivacea
863	80592	29.0216	-100.164	Gastrophyrne_olivacea
864	80593	29.0216	-100.164	Gastrophyrne_olivacea
865	55868	29.03	-98.672	Rana_berlandieri
866	59244	29.04	-107.46	Bufo_debilis
867	59245	29.04	-107.46	Bufo_debilis
868	188156	29.0447	-100.639	Acris_creptians
869	188157	29.0447	-100.639	Acris_creptians
870	188175	29.0447	-100.639	Rana_berlandieri
871	0	29.05	-107.9	Anaxryus_woodhousii
872	0	29.05	-107.9	Anaxryus_woodhousii
873	0	29.05	-107.9	Anaxryus_woodhousii
874	0	29.0541	-107.852	Anaxryus_woodhousii
875	48870	29.055	-107.852	Anaxryus_woodhousii
876	259600	29.066	-100.637	Acris_creptians
877	259599	29.066	-100.637	Acris_creptians
878	53418	29.0671	-100.624	Acris_creptians
879	53419	29.0671	-100.624	Acris_creptians
880	53422	29.0671	-100.624	Acris_creptians
881	53424	29.0671	-100.624	Acris_creptians
882	53425	29.0671	-100.624	Acris_creptians
883	53420	29.0671	-100.624	Acris_creptians
884	53421	29.0671	-100.624	Acris_creptians
885	53423	29.0671	-100.624	Acris_creptians
886	53426	29.0671	-100.624	Acris_creptians
887	53427	29.0671	-100.624	Acris_creptians
888	78989	29.08	-99.7198	Rana_berlandieri
889	78990	29.08	-99.7198	Rana_berlandieri
890	78991	29.08	-99.7198	Rana_berlandieri
891	78988	29.08	-99.7198	Rana_berlandieri
892	28143	29.0833	-102.55	Rana_berlandieri
893	39816	29.09	-100.7	Anaxyrus_punctatus
894	39817	29.09	-100.7	Anaxyrus_punctatus
895	39815	29.09	-100.7	Anaxyrus_punctatus
896	39818	29.09	-100.7	Anaxyrus_punctatus
897	39819	29.09	-100.7	Anaxyrus_punctatus
898	59306	29.09	-105.57	Scaphiopus_couchii
899	2149	29.0958	-98.6589	Rana_berlandieri
900	2160	29.0958	-98.6589	Rana_berlandieri
901	2172	29.0958	-98.6589	Rana_berlandieri
902	2173	29.0958	-98.6589	Rana_berlandieri
903	2174	29.0958	-98.6589	Rana_berlandieri
904	2176	29.0958	-98.6589	Rana_berlandieri
905	2189	29.0958	-98.6589	Rana_berlandieri
906	4352	29.0958	-98.6589	Rana_berlandieri
907	4353	29.0958	-98.6589	Rana_berlandieri
908	2148	29.0958	-98.6589	Rana_berlandieri
909	2158	29.0958	-98.6589	Rana_berlandieri
910	2159	29.0958	-98.6589	Rana_berlandieri
911	2175	29.0958	-98.6589	Rana_berlandieri
912	2190	29.0958	-98.6589	Rana_berlandieri
913	4349	29.0958	-98.6589	Rana_berlandieri
914	4350	29.0958	-98.6589	Rana_berlandieri
915	4351	29.0958	-98.6589	Rana_berlandieri
916	64675	29.0961	-100.591	Scaphiopus_couchii
917	64676	29.0961	-100.591	Scaphiopus_couchii
918	64677	29.0961	-100.591	Scaphiopus_couchii
919	89395	29.0972	-98.1683	Gastrophyrne_olivacea
920	89396	29.0972	-98.1683	Gastrophyrne_olivacea
921	89397	29.0972	-98.1683	Gastrophyrne_olivacea
922	106007	29.1204	-103.058	Gastrophyrne_olivacea
923	15183	29.1363	-98.1574	Bufo_debilis
924	15196	29.1363	-98.1574	Gastrophyrne_olivacea
925	86048	29.1367	-103.519	Scaphiopus_couchii
926	85994	29.1425	-103.527	Scaphiopus_couchii
927	1912	29.1448	-98.7521	Hyla_chrysoscelis
928	1913	29.1448	-98.7521	Hyla_chrysoscelis
929	1917	29.1448	-98.7521	Hyla_chrysoscelis
930	1918	29.1448	-98.7521	Hyla_chrysoscelis
931	1920	29.1448	-98.7521	Hyla_chrysoscelis
932	1923	29.1448	-98.7521	Hyla_chrysoscelis
933	1911	29.1448	-98.7521	Hyla_chrysoscelis
934	1914	29.1448	-98.7521	Hyla_chrysoscelis
935	1915	29.1448	-98.7521	Hyla_chrysoscelis
936	1916	29.1448	-98.7521	Hyla_chrysoscelis
937	1919	29.1448	-98.7521	Hyla_chrysoscelis
938	1921	29.1448	-98.7521	Hyla_chrysoscelis
939	1922	29.1448	-98.7521	Hyla_chrysoscelis
940	2170	29.1448	-98.7521	Rana_berlandieri
941	2169	29.1448	-98.7521	Rana_berlandieri
942	3110	29.1448	-98.7521	Rana_catesbeiana
943	540689	29.1489	-103.488	Anaxyrus_speciosus
944	2186	29.1498	-98.7462	Rana_berlandieri
945	4346	29.1498	-98.7462	Rana_berlandieri
946	4347	29.1498	-98.7462	Rana_berlandieri
947	4348	29.1498	-98.7462	Rana_berlandieri
948	4345	29.1498	-98.7462	Rana_berlandieri
949	59233	29.15	-105.49	Bufo_debilis
950	44474	29.15	-105.483	Rana_catesbeiana
951	44475	29.15	-105.483	Rana_catesbeiana
952	540690	29.1511	-103.501	Anaxyrus_speciosus
953	540704	29.1528	-103.602	Scaphiopus_couchii
954	15593	29.1534	-103.289	Anaxyrus_punctatus
955	15594	29.1534	-103.289	Anaxyrus_punctatus
956	15595	29.1534	-103.289	Anaxyrus_punctatus
957	15596	29.1534	-103.289	Anaxyrus_punctatus
958	2140	29.1549	-98.7402	Rana_berlandieri
959	2146	29.1549	-98.7402	Rana_berlandieri
960	2155	29.1549	-98.7402	Rana_berlandieri
961	2182	29.1549	-98.7402	Rana_berlandieri
962	4336	29.1549	-98.7402	Rana_berlandieri
963	4338	29.1549	-98.7402	Rana_berlandieri
964	4358	29.1549	-98.7402	Rana_berlandieri
965	4360	29.1549	-98.7402	Rana_berlandieri
966	2137	29.1549	-98.7402	Rana_berlandieri
967	2142	29.1549	-98.7402	Rana_berlandieri
968	2151	29.1549	-98.7402	Rana_berlandieri
969	2163	29.1549	-98.7402	Rana_berlandieri
970	4359	29.1549	-98.7402	Rana_berlandieri
971	540688	29.155	-103.596	Anaxyrus_speciosus
972	59227	29.16	-105.48	Bufo_debilis
973	91353	29.1639	-103.654	Rana_berlandieri
974	86036	29.175	-103.158	Rana_berlandieri
975	86037	29.175	-103.158	Rana_berlandieri
976	86038	29.175	-103.158	Rana_berlandieri
977	16442	29.1764	-103.157	Gastrophyrne_olivacea
978	93527	29.1792	-102.953	Rana_catesbeiana
979	93551	29.1792	-102.953	Rana_catesbeiana
980	14350	29.1799	-102.955	Rana_berlandieri
981	93530	29.1812	-102.957	Scaphiopus_couchii
982	93528	29.1819	-102.955	Rana_berlandieri
983	93524	29.182	-102.955	Eleutgerodactylus_guttilatus
984	93529	29.1823	-102.955	Gastrophyrne_olivacea
985	103674	29.1826	-103.961	Anaxryus_woodhousii
986	106079	29.1826	-102.961	Rana_berlandieri
987	106080	29.1826	-102.961	Rana_berlandieri
988	49490	29.1826	-102.961	Scaphiopus_couchii
989	49491	29.1826	-102.961	Scaphiopus_couchii
990	86016	29.1844	-103.968	Rana_berlandieri
991	88080	29.1908	-103.724	Rana_berlandieri
992	88081	29.1925	-103.728	Rana_berlandieri
993	88072	29.1936	-102.968	Rana_berlandieri
994	63759	29.1958	-100.405	Rana_berlandieri
995	56171	29.2	-104.13	Anaxyrus_punctatus
996	56172	29.2	-104.13	Anaxyrus_punctatus
997	56174	29.2	-104.13	Anaxyrus_punctatus
998	56176	29.2	-104.13	Anaxyrus_punctatus
999	56180	29.2	-104.13	Anaxyrus_punctatus
1000	56169	29.2	-104.13	Anaxyrus_punctatus
1001	56170	29.2	-104.13	Anaxyrus_punctatus
1002	56173	29.2	-104.13	Anaxyrus_punctatus
1003	56175	29.2	-104.13	Anaxyrus_punctatus
1004	56177	29.2	-104.13	Anaxyrus_punctatus
1005	56178	29.2	-104.13	Anaxyrus_punctatus
1006	56179	29.2	-104.13	Anaxyrus_punctatus
1007	176123	29.2017	-102.981	Anaxyrus_speciosus
1008	176122	29.2017	-102.981	Anaxyrus_speciosus
1009	176124	29.2017	-102.981	Anaxyrus_speciosus
1010	176125	29.2017	-102.981	Anaxyrus_speciosus
1011	125411	29.204	-100.588	Scaphiopus_couchii
1012	103655	29.2085	-103.371	Anaxyrus_punctatus
1013	12777	29.2122	-103.019	Scaphiopus_couchii
1014	540726	29.2139	-103.732	Anaxyrus_punctatus
1015	540683	29.2139	-103.505	Anaxyrus_punctatus
1016	540682	29.2139	-103.505	Anaxyrus_punctatus
1017	540684	29.2139	-103.505	Anaxyrus_punctatus
1018	0	29.2151	-99.7882	Acris_creptians
1019	0	29.2151	-99.7882	Acris_creptians
1020	0	29.2151	-99.7882	Acris_creptians
1021	0	29.2151	-99.7882	Acris_creptians
1022	0	29.2151	-99.7882	Acris_creptians
1023	0	29.2151	-99.7882	Acris_creptians
1024	0	29.2151	-99.7882	Acris_creptians
1025	0	29.2151	-99.7882	Acris_creptians
1026	0	29.2151	-99.7882	Acris_creptians
1027	0	29.2151	-99.7882	Acris_creptians
1028	8525	29.2152	-99.7885	Scaphiopus_couchii
1029	540725	29.2181	-103.73	Anaxyrus_punctatus
1030	540727	29.2219	-103.496	Anaxyrus_punctatus
1031	0	29.2226	-100.56	Anaxyrus_speciosus
1032	4337	29.226	-98.6576	Rana_berlandieri
1033	4342	29.2271	-98.7902	Rana_berlandieri
1034	4341	29.2271	-98.7902	Rana_berlandieri
1035	125410	29.2273	-100.239	Scaphiopus_couchii
1036	63804	29.2283	-100.554	Scaphiopus_couchii
1037	176011	29.2288	-103.065	Scaphiopus_couchii
1038	47177	29.23	-107.77	Anaxryus_woodhousii
1039	47178	29.23	-107.77	Anaxryus_woodhousii
1040	47179	29.23	-107.77	Anaxryus_woodhousii
1041	47181	29.23	-107.77	Spea_multiplicata
1042	47182	29.23	-107.77	Spea_multiplicata
1043	47183	29.23	-107.77	Spea_multiplicata
1044	47188	29.23	-107.77	Spea_multiplicata
1045	47190	29.23	-107.77	Spea_multiplicata
1046	47195	29.23	-107.77	Spea_multiplicata
1047	47196	29.23	-107.77	Spea_multiplicata
1048	47198	29.23	-107.77	Spea_multiplicata
1049	47203	29.23	-107.77	Spea_multiplicata
1050	47208	29.23	-107.77	Spea_multiplicata
1051	47213	29.23	-107.77	Spea_multiplicata
1052	47218	29.23	-107.77	Spea_multiplicata
1053	47219	29.23	-107.77	Spea_multiplicata
1054	47221	29.23	-107.77	Spea_multiplicata
1055	47180	29.23	-107.77	Spea_multiplicata
1056	47184	29.23	-107.77	Spea_multiplicata
1057	47185	29.23	-107.77	Spea_multiplicata
1058	47186	29.23	-107.77	Spea_multiplicata
1059	47187	29.23	-107.77	Spea_multiplicata
1060	47189	29.23	-107.77	Spea_multiplicata
1061	47191	29.23	-107.77	Spea_multiplicata
1062	47192	29.23	-107.77	Spea_multiplicata
1063	47193	29.23	-107.77	Spea_multiplicata
1064	47194	29.23	-107.77	Spea_multiplicata
1065	47197	29.23	-107.77	Spea_multiplicata
1066	47199	29.23	-107.77	Spea_multiplicata
1067	47200	29.23	-107.77	Spea_multiplicata
1068	47201	29.23	-107.77	Spea_multiplicata
1069	47202	29.23	-107.77	Spea_multiplicata
1070	47204	29.23	-107.77	Spea_multiplicata
1071	47205	29.23	-107.77	Spea_multiplicata
1072	47206	29.23	-107.77	Spea_multiplicata
1073	47207	29.23	-107.77	Spea_multiplicata
1074	47209	29.23	-107.77	Spea_multiplicata
1075	47210	29.23	-107.77	Spea_multiplicata
1076	47211	29.23	-107.77	Spea_multiplicata
1077	47212	29.23	-107.77	Spea_multiplicata
1078	47214	29.23	-107.77	Spea_multiplicata
1079	47215	29.23	-107.77	Spea_multiplicata
1080	47216	29.23	-107.77	Spea_multiplicata
1081	47217	29.23	-107.77	Spea_multiplicata
1082	47220	29.23	-107.77	Spea_multiplicata
1083	47222	29.23	-107.77	Spea_multiplicata
1084	17885	29.2331	-97.215	Gastrophyrne_olivacea
1085	17835	29.2331	-97.215	Hyla_chrysoscelis
1086	17841	29.2331	-97.215	Hyla_chrysoscelis
1087	17834	29.2331	-97.215	Hyla_chrysoscelis
1088	17836	29.2331	-97.215	Hyla_chrysoscelis
1089	17837	29.2331	-97.215	Hyla_chrysoscelis
1090	17838	29.2331	-97.215	Hyla_chrysoscelis
1091	17839	29.2331	-97.215	Hyla_chrysoscelis
1092	17840	29.2331	-97.215	Hyla_chrysoscelis
1093	17898	29.2331	-97.215	Rana_catesbeiana
1094	17899	29.2331	-97.215	Rana_catesbeiana
1095	39863	29.2333	-100.85	Rana_berlandieri
1096	39865	29.2333	-100.85	Rana_berlandieri
1097	39864	29.2333	-100.85	Rana_berlandieri
1098	39866	29.2333	-100.85	Rana_berlandieri
1099	39996	29.2333	-100.85	Rana_berlandieri
1100	0	29.2377	-103.256	Eleutgerodactylus_guttilatus
1101	0	29.2377	-103.256	Eleutgerodactylus_guttilatus
1102	76876	29.2377	-103.256	Eleutgerodactylus_guttilatus
1103	540686	29.2419	-103.374	Anaxyrus_punctatus
1104	88109	29.2469	-103.096	Scaphiopus_couchii
1105	188158	29.2541	-100.751	Acris_creptians
1106	188176	29.2541	-100.751	Rana_berlandieri
1107	540685	29.2561	-103.011	Anaxyrus_punctatus
1108	540721	29.2561	-103.011	Anaxyrus_punctatus
1109	63758	29.2621	-100.409	Rana_berlandieri
1110	0	29.2621	-97.8491	Anaxryus_woodhousii
1111	0	29.2621	-97.8491	Anaxryus_woodhousii
1112	0	29.2621	-97.8491	Anaxryus_woodhousii
1113	2875	29.2622	-98.6578	Rana_berlandieri
1114	106120	29.2645	-103.118	Scaphiopus_couchii
1115	63736	29.2691	-100.41	Bufo_debilis
1116	0	29.27	-106.42	Anaxyrus_punctatus
1117	13315	29.2712	-99.2302	Scaphiopus_couchii
1118	13317	29.2712	-99.2302	Scaphiopus_couchii
1119	13318	29.2712	-99.2302	Scaphiopus_couchii
1120	13319	29.2712	-99.2302	Scaphiopus_couchii
1121	13316	29.2712	-99.2302	Scaphiopus_couchii
1122	176336	29.2717	-103.135	Gastrophyrne_olivacea
1123	93541	29.2737	-103.283	Eleutgerodactylus_guttilatus
1124	103629	29.2738	-103.301	Eleutgerodactylus_guttilatus
1125	15458	29.2772	-98.4956	Rana_berlandieri
1126	15459	29.2772	-98.4956	Rana_berlandieri
1127	540692	29.28	-103.489	Anaxyrus_speciosus
1128	540691	29.28	-103.489	Anaxyrus_speciosus
1129	540728	29.28	-103.489	Anaxyrus_speciosus
1130	78968	29.2836	-98.4894	Rana_catesbeiana
1131	86025	29.285	-103.369	Scaphiopus_couchii
1132	218921	29.286	-103.698	Anaxyrus_punctatus
1133	218922	29.286	-103.698	Anaxyrus_punctatus
1134	7039	29.2911	-100.779	Scaphiopus_couchii
1135	63805	29.2922	-100.462	Scaphiopus_couchii
1136	0	29.2923	-103.854	Gastrophyrne_olivacea
1137	269072	29.2934	-103.271	Eleutgerodactylus_guttilatus
1138	4725	29.2944	-98.4908	Rana_catesbeiana
1139	86024	29.2961	-103.375	Scaphiopus_couchii
1140	71819	29.304	-100.421	Rana_berlandieri
1141	20877	29.3053	-100.421	Anaxyrus_speciosus
1142	540722	29.3061	-103.227	Anaxyrus_punctatus
1143	78945	29.3081	-98.3933	Gastrophyrne_olivacea
1144	78947	29.3081	-98.3933	Gastrophyrne_olivacea
1145	78946	29.3081	-98.3933	Gastrophyrne_olivacea
1146	540731	29.31	-103.028	Gastrophyrne_olivacea
1147	86011	29.31	-103.377	Scaphiopus_couchii
1148	42345	29.3105	-103.067	Anaxyrus_punctatus
1149	42344	29.3105	-103.067	Anaxyrus_punctatus
1150	42350	29.3105	-103.067	Anaxyrus_punctatus
1151	42348	29.3105	-103.067	Anaxyrus_punctatus
1152	42347	29.3105	-103.067	Anaxyrus_punctatus
1153	42343	29.3105	-103.067	Anaxyrus_punctatus
1154	42346	29.3105	-103.067	Anaxyrus_punctatus
1155	42342	29.3105	-103.067	Anaxyrus_punctatus
1156	42349	29.3105	-103.067	Anaxyrus_punctatus
1157	269726	29.3147	-99.4808	Acris_creptians
1158	269805	29.3147	-99.4808	Rana_berlandieri
1159	86010	29.3161	-103.383	Scaphiopus_couchii
1160	45693	29.3167	-105.333	Spea_multiplicata
1161	218920	29.3172	-103.658	Anaxyrus_punctatus
1162	218919	29.3172	-103.658	Anaxyrus_punctatus
1163	49040	29.3173	-99.2757	Gastrophyrne_olivacea
1164	49042	29.3173	-99.2757	Gastrophyrne_olivacea
1165	49041	29.3173	-99.2757	Gastrophyrne_olivacea
1166	49043	29.3173	-99.2757	Gastrophyrne_olivacea
1167	49044	29.3173	-99.2757	Gastrophyrne_olivacea
1168	49021	29.3173	-99.2757	Scaphiopus_couchii
1169	49023	29.3173	-99.2757	Scaphiopus_couchii
1170	49022	29.3173	-99.2757	Scaphiopus_couchii
1171	49024	29.3173	-99.2757	Scaphiopus_couchii
1172	91900	29.3181	-103.193	Scaphiopus_couchii
1173	86012	29.3183	-103.385	Scaphiopus_couchii
1174	9112	29.3212	-103.615	Spea_multiplicata
1175	47110	29.3212	-103.615	Anaxyrus_punctatus
1176	47112	29.3212	-103.615	Scaphiopus_couchii
1177	47111	29.3212	-103.615	Scaphiopus_couchii
1178	86041	29.3219	-103.209	Scaphiopus_couchii
1179	70647	29.3226	-106.45	Bufo_debilis
1180	68778	29.3226	-106.45	Scaphiopus_couchii
1181	68780	29.3226	-106.45	Scaphiopus_couchii
1182	70619	29.3226	-106.45	Scaphiopus_couchii
1183	70620	29.3226	-106.45	Scaphiopus_couchii
1184	70621	29.3226	-106.45	Scaphiopus_couchii
1185	68776	29.3226	-106.45	Scaphiopus_couchii
1186	68777	29.3226	-106.45	Scaphiopus_couchii
1187	68779	29.3226	-106.45	Scaphiopus_couchii
1188	70617	29.3226	-106.45	Scaphiopus_couchii
1189	70618	29.3226	-106.45	Scaphiopus_couchii
1190	72791	29.3226	-106.45	Spea_multiplicata
1191	89392	29.3228	-98.4553	Gastrophyrne_olivacea
1192	89393	29.3228	-98.4553	Gastrophyrne_olivacea
1193	89394	29.3228	-98.4553	Gastrophyrne_olivacea
1194	89398	29.3228	-98.4553	Gastrophyrne_olivacea
1195	89413	29.3228	-98.4553	Scaphiopus_couchii
1196	218916	29.3239	-103.584	Anaxyrus_punctatus
1197	218924	29.3256	-103.567	Scaphiopus_couchii
1198	106081	29.3264	-103.557	Rana_berlandieri
1199	2644	29.3265	-99.2947	Gastrophyrne_olivacea
1200	204464	29.327	-103.553	Rana_berlandieri
1201	204465	29.327	-103.553	Rana_berlandieri
1202	204468	29.327	-103.553	Rana_berlandieri
1203	204462	29.327	-103.553	Rana_berlandieri
1204	204463	29.327	-103.553	Rana_berlandieri
1205	204466	29.327	-103.553	Rana_berlandieri
1206	204467	29.327	-103.553	Rana_berlandieri
1207	204469	29.327	-103.553	Rana_berlandieri
1208	89409	29.3275	-98.4536	Rana_catesbeiana
1209	89755	29.33	-98.46	Eleutherodactylus_cystignathoid
1210	188152	29.3315	-100.518	Acris_creptians
1211	188153	29.3315	-100.518	Acris_creptians
1212	86044	29.3364	-103.379	Scaphiopus_couchii
1213	88108	29.3369	-103.322	Scaphiopus_couchii
1214	1396	29.3374	-100.542	Acris_creptians
1215	311325	29.3403	-103.256	Anaxyrus_punctatus
1216	311326	29.3403	-103.256	Anaxyrus_punctatus
1217	78861	29.3428	-98.4408	Bufo_debilis
1218	79010	29.3428	-98.4408	Scaphiopus_couchii
1219	176033	29.3452	-103.345	Anaxyrus_punctatus
1220	64203	29.3525	-99.7453	Scaphiopus_couchii
1221	13396	29.3578	-99.1804	Bufo_debilis
1222	13397	29.3578	-99.1804	Bufo_debilis
1223	13398	29.3578	-99.1804	Bufo_debilis
1224	13394	29.3578	-99.1804	Bufo_debilis
1225	13395	29.3578	-99.1804	Bufo_debilis
1226	68365	29.359	-99.279	Gastrophyrne_olivacea
1227	7655	29.3598	-100.939	Acris_creptians
1228	7656	29.3598	-100.939	Acris_creptians
1229	7657	29.3598	-100.939	Acris_creptians
1230	7651	29.3598	-100.939	Acris_creptians
1231	7652	29.3598	-100.939	Acris_creptians
1232	7653	29.3598	-100.939	Acris_creptians
1233	7654	29.3598	-100.939	Acris_creptians
1234	7658	29.3598	-100.939	Acris_creptians
1235	7650	29.3598	-100.939	Rana_berlandieri
1236	540723	29.36	-103.4	Anaxyrus_punctatus
1237	0	29.3625	-100.896	Rana_berlandieri
1238	540724	29.3639	-103.406	Anaxyrus_punctatus
1239	540703	29.37	-103.168	Scaphiopus_couchii
1240	106009	29.3707	-103.166	Gastrophyrne_olivacea
1241	106008	29.3707	-103.166	Gastrophyrne_olivacea
1242	106010	29.3707	-103.166	Gastrophyrne_olivacea
1243	107395	29.3732	-100.883	Acris_creptians
1244	26564	29.3733	-100.662	Acris_creptians
1245	26563	29.3733	-100.662	Acris_creptians
1246	26562	29.3733	-100.662	Acris_creptians
1247	115363	29.3752	-104.107	Scaphiopus_couchii
1248	51596	29.38	-106.41	Bufo_debilis
1249	218918	29.3802	-103.627	Anaxyrus_punctatus
1250	218917	29.3802	-103.627	Anaxyrus_punctatus
1251	78862	29.3853	-98.6189	Bufo_debilis
1252	78863	29.3853	-98.6189	Bufo_debilis
1253	78944	29.3853	-98.6189	Gastrophyrne_olivacea
1254	68360	29.3855	-98.5787	Gastrophyrne_olivacea
1255	68353	29.3855	-98.5787	Pseudacris_clarkii
1256	68359	29.3855	-98.5787	Scaphiopus_couchii
1257	7648	29.3893	-100.705	Acris_creptians
1258	7646	29.3893	-100.705	Rana_berlandieri
1259	7647	29.3893	-100.705	Rana_berlandieri
1260	72787	29.3921	-106.899	Spea_multiplicata
1261	72788	29.3921	-106.899	Spea_multiplicata
1262	72789	29.3921	-106.899	Spea_multiplicata
1263	187788	29.4	-105.15	Eleutherodactylus_marnockii
1264	85946	29.4136	-103.141	Bufo_debilis
1265	129136	29.4138	-100.896	Eleutherodactylus_cystignathoid
1266	129136	29.4138	-100.896	Eleutherodactylus_marnockii
1267	78963	29.4147	-98.4922	Psuedacris_streckeri
1268	139161	29.4153	-100.896	Eleutherodactylus_marnockii
1269	139162	29.4153	-100.896	Eleutherodactylus_marnockii
1270	13328	29.4201	-99.1415	Scaphiopus_couchii
1271	109131	29.4201	-100.056	Scaphiopus_couchii
1272	4324	29.4236	-98.4236	Rana_catesbeiana
1273	4323	29.4236	-98.4236	Rana_catesbeiana
1274	68348	29.4239	-98.4933	Acris_creptians
1275	68350	29.4239	-98.4933	Acris_creptians
1276	68349	29.4239	-98.4933	Acris_creptians
1277	68351	29.4239	-98.4933	Acris_creptians
1278	68339	29.4239	-98.4933	Eleutherodactylus_marnockii
1279	68338	29.4239	-98.4933	Eleutherodactylus_marnockii
1280	68361	29.4239	-98.4933	Gastrophyrne_olivacea
1281	68362	29.4239	-98.4933	Gastrophyrne_olivacea
1282	68343	29.4239	-98.4933	Rana_berlandieri
1283	68344	29.4239	-98.4933	Rana_berlandieri
1284	68345	29.4239	-98.4933	Rana_berlandieri
1285	68346	29.4239	-98.4933	Rana_berlandieri
1286	68347	29.4239	-98.4933	Rana_berlandieri
1287	68352	29.4239	-98.4933	Rana_catesbeiana
1288	6850	29.4239	-98.4933	Scaphiopus_couchii
1289	540732	29.4269	-103.139	Scaphiopus_couchii
1290	79012	29.4319	-98.4831	Scaphiopus_couchii
1291	79011	29.4319	-98.4831	Scaphiopus_couchii
1292	85945	29.4361	-103.138	Scaphiopus_couchii
1293	78959	29.4372	-98.4908	Pseudacris_clarkii
1294	78958	29.4372	-98.4908	Pseudacris_clarkii
1295	20127	29.4383	-98.4906	Bufo_debilis
1296	0	29.4399	-97.8445	Anaxryus_woodhousii
1297	85963	29.4408	-103.138	Bufo_debilis
1298	85962	29.4461	-103.138	Scaphiopus_couchii
1299	31064	29.4466	-98.494	Acris_creptians
1300	31065	29.4466	-98.494	Acris_creptians
1301	31067	29.4466	-98.494	Acris_creptians
1302	31068	29.4466	-98.494	Acris_creptians
1303	31069	29.4466	-98.494	Acris_creptians
1304	31070	29.4466	-98.494	Acris_creptians
1305	31071	29.4466	-98.494	Acris_creptians
1306	74046	29.4466	-98.494	Bufo_debilis
1307	74043	29.4466	-98.494	Gastrophyrne_olivacea
1308	74044	29.4466	-98.494	Gastrophyrne_olivacea
1309	15594	29.4466	-98.494	Gastrophyrne_olivacea
1310	31058	29.4466	-98.494	Rana_berlandieri
1311	31060	29.4466	-98.494	Rana_berlandieri
1312	31059	29.4466	-98.494	Rana_berlandieri
1313	31061	29.4466	-98.494	Rana_berlandieri
1314	31052	29.4466	-98.494	Rana_berlandieri
1315	31057	29.4466	-98.494	Rana_berlandieri
1316	31062	29.4466	-98.494	Rana_berlandieri
1317	31055	29.4466	-98.494	Rana_catesbeiana
1318	31046	29.4466	-98.494	Rana_catesbeiana
1319	31054	29.4466	-98.494	Rana_catesbeiana
1320	31056	29.4466	-98.494	Rana_catesbeiana
1321	31051	29.4466	-98.494	Rana_catesbeiana
1322	31047	29.4466	-98.494	Rana_catesbeiana
1323	31048	29.4466	-98.494	Rana_catesbeiana
1324	31049	29.4466	-98.494	Rana_catesbeiana
1325	31050	29.4466	-98.494	Rana_catesbeiana
1326	31053	29.4466	-98.494	Rana_catesbeiana
1327	17771	29.4466	-98.494	Scaphiopus_couchii
1328	152493	29.449	-106.42	Rana_berlandieri
1329	175692	29.4555	-100.952	Scaphiopus_couchii
1330	175691	29.4555	-100.952	Scaphiopus_couchii
1331	823	29.4589	-101.059	Scaphiopus_couchii
1332	824	29.4589	-101.059	Scaphiopus_couchii
1333	826	29.4589	-101.059	Scaphiopus_couchii
1334	825	29.4589	-101.059	Scaphiopus_couchii
1335	85961	29.4606	-103.138	Scaphiopus_couchii
1336	85960	29.4619	-103.138	Bufo_debilis
1337	70571	29.4622	-106.33	Gastrophyrne_olivacea
1338	70600	29.4622	-106.33	Scaphiopus_couchii
1339	70601	29.4622	-106.33	Scaphiopus_couchii
1340	70602	29.4622	-106.33	Scaphiopus_couchii
1341	15197	29.4661	-98.4331	Rana_berlandieri
1342	15198	29.4661	-98.4331	Rana_berlandieri
1343	188265	29.4694	-103.523	Scaphiopus_couchii
1344	188266	29.4694	-103.523	Scaphiopus_couchii
1345	188143	29.4702	-103.525	Gastrophyrne_olivacea
1346	188154	29.4783	-100.981	Acris_creptians
1347	188155	29.4783	-100.981	Acris_creptians
1348	85958	29.4792	-103.137	Scaphiopus_couchii
1349	583049	29.48	-106.35	Anaxyrus_speciosus
1350	583052	29.48	-106.35	Anaxyrus_speciosus
1351	583053	29.48	-106.35	Anaxyrus_speciosus
1352	583050	29.48	-106.35	Anaxyrus_speciosus
1353	583051	29.48	-106.35	Anaxyrus_speciosus
1354	2654	29.48	-106.35	Anaxyrus_speciosus
1355	72752	29.4802	-106.402	Bufo_debilis
1356	72754	29.4802	-106.402	Bufo_debilis
1357	72756	29.4802	-106.402	Bufo_debilis
1358	72757	29.4802	-106.402	Bufo_debilis
1359	72759	29.4802	-106.402	Bufo_debilis
1360	72760	29.4802	-106.402	Bufo_debilis
1361	72761	29.4802	-106.402	Bufo_debilis
1362	72753	29.4802	-106.402	Bufo_debilis
1363	72755	29.4802	-106.402	Bufo_debilis
1364	72758	29.4802	-106.402	Bufo_debilis
1365	72774	29.4802	-106.402	Scaphiopus_couchii
1366	72775	29.4802	-106.402	Scaphiopus_couchii
1367	72776	29.4802	-106.402	Scaphiopus_couchii
1368	72778	29.4802	-106.402	Scaphiopus_couchii
1369	72777	29.4802	-106.402	Scaphiopus_couchii
1370	72779	29.4802	-106.402	Scaphiopus_couchii
1371	72792	29.4802	-106.402	Spea_multiplicata
1372	48105	29.4831	-98.6017	Eleutherodactylus_cystignathoid
1373	48106	29.4831	-98.6017	Eleutherodactylus_cystignathoid
1374	26568	29.4855	-100.997	Acris_creptians
1375	26570	29.4855	-100.997	Acris_creptians
1376	26567	29.4855	-100.997	Acris_creptians
1377	88619	29.4855	-100.997	Acris_creptians
1378	26565	29.4855	-100.997	Acris_creptians
1379	26566	29.4855	-100.997	Acris_creptians
1380	88618	29.4855	-100.997	Acris_creptians
1381	88620	29.4855	-100.997	Acris_creptians
1382	88617	29.4855	-100.997	Acris_creptians
1383	26569	29.4855	-100.997	Acris_creptians
1384	90560	29.4855	-100.997	Gastrophyrne_olivacea
1385	90561	29.4855	-100.997	Gastrophyrne_olivacea
1386	91358	29.4855	-100.997	Rana_berlandieri
1387	14375	29.489	-103.129	Scaphiopus_couchii
1388	14374	29.4968	-103.126	Scaphiopus_couchii
1389	7302	29.4994	-100.704	Gastrophyrne_olivacea
1390	6230	29.502	-100.97	Acris_creptians
1391	7298	29.5033	-100.985	Gastrophyrne_olivacea
1392	7299	29.5033	-100.985	Gastrophyrne_olivacea
1393	7301	29.5033	-100.985	Gastrophyrne_olivacea
1394	7300	29.5033	-100.985	Gastrophyrne_olivacea
1395	7297	29.5033	-100.985	Gastrophyrne_olivacea
1396	7296	29.5033	-100.985	Gastrophyrne_olivacea
1397	53979	29.5039	-97.7188	Gastrophyrne_olivacea
1398	53980	29.5039	-97.7188	Gastrophyrne_olivacea
1399	7307	29.5092	-100.998	Gastrophyrne_olivacea
1400	7312	29.5092	-100.998	Gastrophyrne_olivacea
1401	7306	29.5092	-100.998	Gastrophyrne_olivacea
1402	7316	29.5092	-100.998	Gastrophyrne_olivacea
1403	7308	29.5092	-100.998	Gastrophyrne_olivacea
1404	7305	29.5092	-100.998	Gastrophyrne_olivacea
1405	7315	29.5092	-100.998	Gastrophyrne_olivacea
1406	7309	29.5092	-100.998	Gastrophyrne_olivacea
1407	7304	29.5092	-100.998	Gastrophyrne_olivacea
1408	7314	29.5092	-100.998	Gastrophyrne_olivacea
1409	7310	29.5092	-100.998	Gastrophyrne_olivacea
1410	7303	29.5092	-100.998	Gastrophyrne_olivacea
1411	7317	29.5092	-100.998	Gastrophyrne_olivacea
1412	7313	29.5092	-100.998	Gastrophyrne_olivacea
1413	7311	29.5092	-100.998	Gastrophyrne_olivacea
1414	38695	29.5108	-98.7772	Pseudacris_clarkii
1415	0	29.5283	-97.8412	Anaxryus_woodhousii
1416	139159	29.5339	-99.3754	Eleutherodactylus_marnockii
1417	68364	29.5339	-99.3754	Gastrophyrne_olivacea
1418	9863	29.5388	-103.614	Rana_berlandieri
1419	20129	29.5392	-98.57	Scaphiopus_couchii
1420	20130	29.5392	-98.57	Scaphiopus_couchii
1421	1112	29.5489	-101.059	Bufo_debilis
1422	93601	29.5522	-103.793	Gastrophyrne_olivacea
1423	64201	29.5531	-99.5718	Scaphiopus_couchii
1424	64202	29.5531	-99.5718	Scaphiopus_couchii
1425	10489	29.5604	-104.321	Scaphiopus_couchii
1426	76674	29.5666	-104.371	Scaphiopus_couchii
1427	52052	29.5667	-104.433	Anaxyrus_speciosus
1428	52056	29.5667	-104.433	Anaxyrus_speciosus
1429	52057	29.5667	-104.433	Anaxyrus_speciosus
1430	52051	29.5667	-104.433	Anaxyrus_speciosus
1431	52053	29.5667	-104.433	Anaxyrus_speciosus
1432	52055	29.5667	-104.433	Anaxyrus_speciosus
1433	52033	29.5667	-104.433	Anaxryus_woodhousii
1434	52034	29.5667	-104.433	Anaxryus_woodhousii
1435	52035	29.5667	-104.433	Anaxryus_woodhousii
1436	52037	29.5667	-104.433	Anaxryus_woodhousii
1437	52039	29.5667	-104.433	Anaxryus_woodhousii
1438	52041	29.5667	-104.433	Anaxryus_woodhousii
1439	52045	29.5667	-104.433	Anaxryus_woodhousii
1440	52048	29.5667	-104.433	Anaxryus_woodhousii
1441	52038	29.5667	-104.433	Anaxryus_woodhousii
1442	52040	29.5667	-104.433	Anaxryus_woodhousii
1443	52046	29.5667	-104.433	Anaxryus_woodhousii
1444	52054	29.5667	-104.433	Anaxryus_woodhousii
1445	52047	29.5667	-104.433	Anaxryus_woodhousii
1446	85947	29.5711	-103.136	Scaphiopus_couchii
1447	0	29.5713	-102.946	Anaxyrus_punctatus
1448	0	29.5713	-102.946	Anaxyrus_punctatus
1449	0	29.5713	-102.946	Anaxyrus_punctatus
1450	14517	29.5737	-103.615	Anaxyrus_punctatus
1451	14520	29.5737	-103.615	Anaxyrus_punctatus
1452	14521	29.5737	-103.615	Anaxyrus_punctatus
1453	14523	29.5737	-103.615	Anaxyrus_punctatus
1454	14524	29.5737	-103.615	Anaxyrus_punctatus
1455	14525	29.5737	-103.615	Anaxyrus_punctatus
1456	14528	29.5737	-103.615	Anaxyrus_punctatus
1457	14529	29.5737	-103.615	Anaxyrus_punctatus
1458	14530	29.5737	-103.615	Anaxyrus_punctatus
1459	14533	29.5737	-103.615	Anaxyrus_punctatus
1460	14534	29.5737	-103.615	Anaxyrus_punctatus
1461	14535	29.5737	-103.615	Anaxyrus_punctatus
1462	14515	29.5737	-103.615	Anaxyrus_punctatus
1463	14516	29.5737	-103.615	Anaxyrus_punctatus
1464	14518	29.5737	-103.615	Anaxyrus_punctatus
1465	14519	29.5737	-103.615	Anaxyrus_punctatus
1466	14522	29.5737	-103.615	Anaxyrus_punctatus
1467	14526	29.5737	-103.615	Anaxyrus_punctatus
1468	14527	29.5737	-103.615	Anaxyrus_punctatus
1469	14531	29.5737	-103.615	Anaxyrus_punctatus
1470	14532	29.5737	-103.615	Anaxyrus_punctatus
1471	106006	29.5753	-103.084	Gastrophyrne_olivacea
1472	0	29.5817	-100.098	Acris_creptians
1473	0	29.5817	-100.098	Acris_creptians
1474	0	29.5817	-100.098	Acris_creptians
1475	0	29.5817	-100.098	Acris_creptians
1476	0	29.5817	-100.098	Acris_creptians
1477	0	29.5817	-100.098	Acris_creptians
1478	0	29.5817	-100.098	Acris_creptians
1479	0	29.5817	-100.098	Acris_creptians
1480	0	29.5817	-100.098	Acris_creptians
1481	0	29.5817	-100.098	Acris_creptians
1482	0	29.5817	-100.098	Acris_creptians
1483	0	29.5817	-100.098	Acris_creptians
1484	0	29.5817	-100.098	Acris_creptians
1485	0	29.5817	-100.098	Acris_creptians
1486	0	29.5817	-100.098	Acris_creptians
1487	0	29.5817	-100.098	Acris_creptians
1488	0	29.5817	-100.098	Acris_creptians
1489	0	29.5817	-100.098	Acris_creptians
1490	0	29.5817	-100.098	Acris_creptians
1491	0	29.5817	-100.098	Acris_creptians
1492	0	29.5817	-100.098	Acris_creptians
1493	0	29.5817	-100.098	Acris_creptians
1494	0	29.5817	-100.098	Acris_creptians
1495	0	29.5817	-100.098	Acris_creptians
1496	0	29.5817	-100.098	Acris_creptians
1497	0	29.5817	-100.098	Acris_creptians
1498	0	29.5817	-100.098	Acris_creptians
1499	0	29.5817	-100.098	Acris_creptians
1500	0	29.5817	-100.098	Acris_creptians
1501	0	29.5817	-100.098	Acris_creptians
1502	0	29.5817	-100.098	Acris_creptians
1503	0	29.5817	-100.098	Acris_creptians
1504	0	29.5817	-100.098	Acris_creptians
1505	0	29.5817	-100.098	Acris_creptians
1506	0	29.5817	-100.098	Acris_creptians
1507	0	29.5817	-100.098	Acris_creptians
1508	0	29.5817	-100.098	Acris_creptians
1509	0	29.5817	-100.098	Acris_creptians
1510	0	29.5817	-100.098	Acris_creptians
1511	0	29.5817	-100.098	Acris_creptians
1512	0	29.5817	-100.098	Acris_creptians
1513	0	29.5817	-100.098	Acris_creptians
1514	0	29.5817	-100.098	Acris_creptians
1515	0	29.5817	-100.098	Acris_creptians
1516	0	29.5817	-100.098	Acris_creptians
1517	0	29.5817	-100.098	Acris_creptians
1518	0	29.5817	-100.098	Acris_creptians
1519	0	29.5817	-100.098	Acris_creptians
1520	0	29.5817	-100.098	Acris_creptians
1521	0	29.5817	-100.098	Acris_creptians
1522	0	29.5817	-100.098	Acris_creptians
1523	99186	29.583	-99.739	Eleutherodactylus_marnockii
1524	99189	29.583	-99.739	Eleutherodactylus_marnockii
1525	99184	29.583	-99.739	Eleutherodactylus_marnockii
1526	99185	29.583	-99.739	Eleutherodactylus_marnockii
1527	99187	29.583	-99.739	Eleutherodactylus_marnockii
1528	99188	29.583	-99.739	Eleutherodactylus_marnockii
1529	99190	29.583	-99.739	Eleutherodactylus_marnockii
1530	85950	29.5917	-103.141	Scaphiopus_couchii
1531	14347	29.5997	-103.134	Bufo_debilis
1532	14345	29.5997	-103.134	Bufo_debilis
1533	14346	29.5997	-103.134	Bufo_debilis
1534	14349	29.5997	-103.134	Gastrophyrne_olivacea
1535	14348	29.5997	-103.134	Gastrophyrne_olivacea
1536	85949	29.6	-103.143	Scaphiopus_couchii
1537	85951	29.6083	-103.144	Bufo_debilis
1538	85952	29.6083	-103.144	Gastrophyrne_olivacea
1539	53681	29.61	-98.321	Rana_berlandieri
1540	37705	29.6108	-100.447	Anaxyrus_punctatus
1541	37709	29.6108	-100.447	Anaxyrus_punctatus
1542	37712	29.6108	-100.447	Anaxyrus_punctatus
1543	37706	29.6108	-100.447	Anaxyrus_punctatus
1544	37707	29.6108	-100.447	Anaxyrus_punctatus
1545	37708	29.6108	-100.447	Anaxyrus_punctatus
1546	37710	29.6108	-100.447	Anaxyrus_punctatus
1547	37711	29.6108	-100.447	Anaxyrus_punctatus
1548	38325	29.6108	-100.447	Craugastor_augusti
1549	38326	29.6108	-100.447	Craugastor_augusti
1550	37717	29.6108	-100.447	Eleutherodactylus_marnockii
1551	37718	29.6108	-100.447	Eleutherodactylus_marnockii
1552	37721	29.6108	-100.447	Eleutherodactylus_marnockii
1553	37722	29.6108	-100.447	Eleutherodactylus_marnockii
1554	37723	29.6108	-100.447	Eleutherodactylus_marnockii
1555	37715	29.6108	-100.447	Eleutherodactylus_marnockii
1556	37716	29.6108	-100.447	Eleutherodactylus_marnockii
1557	37719	29.6108	-100.447	Eleutherodactylus_marnockii
1558	37720	29.6108	-100.447	Eleutherodactylus_marnockii
1559	37724	29.6108	-100.447	Eleutherodactylus_marnockii
1560	37727	29.6108	-100.447	Gastrophyrne_olivacea
1561	37728	29.6108	-100.447	Gastrophyrne_olivacea
1562	37729	29.6108	-100.447	Gastrophyrne_olivacea
1563	37730	29.6108	-100.447	Gastrophyrne_olivacea
1564	37732	29.6108	-100.447	Gastrophyrne_olivacea
1565	37725	29.6108	-100.447	Gastrophyrne_olivacea
1566	37726	29.6108	-100.447	Gastrophyrne_olivacea
1567	37731	29.6108	-100.447	Gastrophyrne_olivacea
1568	37733	29.6108	-100.447	Scaphiopus_couchii
1569	37734	29.6108	-100.447	Scaphiopus_couchii
1570	37736	29.6108	-100.447	Scaphiopus_couchii
1571	37737	29.6108	-100.447	Scaphiopus_couchii
1572	37739	29.6108	-100.447	Scaphiopus_couchii
1573	37735	29.6108	-100.447	Scaphiopus_couchii
1574	37738	29.6108	-100.447	Scaphiopus_couchii
1575	0	29.6184	-98.4887	Gastrophyrne_olivacea
1576	0	29.6184	-98.4887	Hyla_chrysoscelis
1577	85953	29.6206	-103.142	Scaphiopus_couchii
1578	85954	29.6233	-103.143	Scaphiopus_couchii
1579	222509	29.6271	-100.921	Eleutherodactylus_marnockii
1580	121345	29.6333	-109.933	Rana_berlandieri
1581	85989	29.635	-103.151	Scaphiopus_couchii
1582	83945	29.6404	-100.419	Gastrophyrne_olivacea
1583	83931	29.6404	-100.419	Rana_berlandieri
1584	83952	29.6404	-100.419	Scaphiopus_couchii
1585	85955	29.6478	-103.171	Scaphiopus_couchii
1586	79013	29.6501	-99.5408	Scaphiopus_couchii
1587	85957	29.6547	-103.173	Scaphiopus_couchii
1588	139051	29.6608	-101.173	Scaphiopus_couchii
1589	139050	29.6608	-101.173	Scaphiopus_couchii
1590	15451	29.6699	-99.2537	Rana_berlandieri
1591	15452	29.6699	-99.2537	Rana_berlandieri
1592	15450	29.6699	-99.2537	Rana_berlandieri
1593	114227	29.67	-106.09	Leptodactylus_fragilis
1594	114228	29.67	-106.09	Leptodactylus_fragilis
1595	114226	29.67	-106.09	Leptodactylus_fragilis
1596	114039	29.67	-106.09	Rhinophrynus_dorsalis
1597	114501	29.67	-106.09	Smilisca_baudinii
1598	114498	29.67	-106.09	Smilisca_baudinii
1599	114503	29.67	-106.09	Smilisca_baudinii
1600	114502	29.67	-106.09	Smilisca_baudinii
1601	114504	29.67	-106.09	Smilisca_baudinii
1602	114500	29.67	-106.09	Smilisca_baudinii
1603	114499	29.67	-106.09	Smilisca_baudinii
1604	12690	29.675	-98.154	Gastrophyrne_olivacea
1605	79898	29.6761	-99.5477	Rana_berlandieri
1606	139127	29.684	-101.203	Bufo_debilis
1607	139125	29.684	-101.203	Bufo_debilis
1608	139126	29.684	-101.203	Bufo_debilis
1609	139139	29.684	-101.203	Gastrophyrne_olivacea
1610	139140	29.684	-101.203	Gastrophyrne_olivacea
1611	139136	29.684	-101.203	Gastrophyrne_olivacea
1612	139137	29.684	-101.203	Gastrophyrne_olivacea
1613	139138	29.684	-101.203	Gastrophyrne_olivacea
1614	0	29.6842	-101.367	Rana_berlandieri
1615	46153	29.6844	-101.175	Anaxyrus_punctatus
1616	46151	29.6844	-101.175	Anaxyrus_speciosus
1617	46152	29.6844	-101.175	Anaxyrus_speciosus
1618	0	29.6867	-101.174	Anaxyrus_punctatus
1619	45356	29.6868	-101.371	Anaxyrus_speciosus
1620	6982	29.6948	-101.187	Bufo_debilis
1621	6981	29.6948	-101.187	Bufo_debilis
1622	6983	29.6948	-101.187	Bufo_debilis
1623	206340	29.695	-101.187	Anaxyrus_speciosus
1624	206341	29.695	-101.187	Anaxyrus_speciosus
1625	0	29.696	-99.7748	Anaxyrus_punctatus
1626	1242	29.6968	-100.99	Acris_creptians
1627	1243	29.6968	-100.99	Acris_creptians
1628	15485	29.6978	-99.3703	Rana_berlandieri
1629	15486	29.6978	-99.3703	Rana_berlandieri
1630	15487	29.6978	-99.3703	Rana_berlandieri
1631	15479	29.6989	-99.2533	Rana_berlandieri
1632	11494	29.6993	-101.371	Anaxyrus_speciosus
1633	7076	29.7076	-101.197	Scaphiopus_couchii
1634	85085	29.7089	-103.161	Scaphiopus_couchii
1635	7029	29.7119	-101.2	Scaphiopus_couchii
1636	79893	29.7179	-99.7386	Gastrophyrne_olivacea
1637	79894	29.7179	-99.7386	Gastrophyrne_olivacea
1638	0	29.7186	-99.6606	Craugastor_augusti
1639	0	29.7252	-100.034	Acris_creptians
1640	0	29.7252	-100.034	Acris_creptians
1641	0	29.7252	-100.034	Acris_creptians
1642	0	29.7252	-100.034	Acris_creptians
1643	0	29.7252	-100.034	Acris_creptians
1644	6984	29.7259	-100.825	Bufo_debilis
1645	0	29.7267	-103.566	Anaxyrus_punctatus
1646	15488	29.7285	-99.3349	Rana_berlandieri
1647	2327	29.7286	-99.7611	Scaphiopus_couchii
1648	10176	29.7331	-101.145	Scaphiopus_couchii
1649	7031	29.7336	-101.21	Scaphiopus_couchii
1650	78986	29.736	-99.1219	Rana_berlandieri
1651	78969	29.736	-99.1219	Rana_catesbeiana
1652	85084	29.7373	-101.381	Scaphiopus_couchii
1653	85083	29.7373	-101.381	Scaphiopus_couchii
1654	108841	29.75	-109.667	Gastrophyrne_olivacea
1655	136487	29.7539	-108.894	Gastrophyrne_olivacea
1656	136491	29.7539	-108.894	Gastrophyrne_olivacea
1657	136492	29.7539	-108.894	Gastrophyrne_olivacea
1658	136493	29.7539	-108.894	Gastrophyrne_olivacea
1659	136494	29.7539	-108.894	Gastrophyrne_olivacea
1660	136495	29.7539	-108.894	Gastrophyrne_olivacea
1661	136496	29.7539	-108.894	Gastrophyrne_olivacea
1662	136497	29.7539	-108.894	Gastrophyrne_olivacea
1663	136498	29.7539	-108.894	Gastrophyrne_olivacea
1664	136499	29.7539	-108.894	Gastrophyrne_olivacea
1665	136500	29.7539	-108.894	Gastrophyrne_olivacea
1666	136504	29.7539	-108.894	Gastrophyrne_olivacea
1667	136508	29.7539	-108.894	Gastrophyrne_olivacea
1668	136510	29.7539	-108.894	Gastrophyrne_olivacea
1669	136511	29.7539	-108.894	Gastrophyrne_olivacea
1670	136512	29.7539	-108.894	Gastrophyrne_olivacea
1671	136486	29.7539	-108.894	Gastrophyrne_olivacea
1672	136488	29.7539	-108.894	Gastrophyrne_olivacea
1673	136489	29.7539	-108.894	Gastrophyrne_olivacea
1674	136490	29.7539	-108.894	Gastrophyrne_olivacea
1675	136501	29.7539	-108.894	Gastrophyrne_olivacea
1676	136502	29.7539	-108.894	Gastrophyrne_olivacea
1677	136503	29.7539	-108.894	Gastrophyrne_olivacea
1678	136505	29.7539	-108.894	Gastrophyrne_olivacea
1679	136506	29.7539	-108.894	Gastrophyrne_olivacea
1680	136507	29.7539	-108.894	Gastrophyrne_olivacea
1681	136509	29.7539	-108.894	Gastrophyrne_olivacea
1682	90117	29.7615	-100.721	Anaxyrus_punctatus
1683	91276	29.7615	-100.721	Rana_berlandieri
1684	0	29.7618	-104.281	Scaphiopus_couchii
1685	60242	29.7644	-99.449	Eleutherodactylus_marnockii
1686	540687	29.7789	-103.073	Anaxyrus_punctatus
1687	60502	29.7847	-99.3705	Anaxyrus_punctatus
1688	60506	29.7847	-99.3705	Anaxyrus_punctatus
1689	60507	29.7847	-99.3705	Anaxyrus_punctatus
1690	60508	29.7847	-99.3705	Anaxyrus_punctatus
1691	60513	29.7847	-99.3705	Anaxyrus_punctatus
1692	60499	29.7847	-99.3705	Anaxyrus_punctatus
1693	60500	29.7847	-99.3705	Anaxyrus_punctatus
1694	60501	29.7847	-99.3705	Anaxyrus_punctatus
1695	60503	29.7847	-99.3705	Anaxyrus_punctatus
1696	60504	29.7847	-99.3705	Anaxyrus_punctatus
1697	60505	29.7847	-99.3705	Anaxyrus_punctatus
1698	60509	29.7847	-99.3705	Anaxyrus_punctatus
1699	60510	29.7847	-99.3705	Anaxyrus_punctatus
1700	60511	29.7847	-99.3705	Anaxyrus_punctatus
1701	60512	29.7847	-99.3705	Anaxyrus_punctatus
1702	60243	29.7847	-99.3705	Eleutherodactylus_marnockii
1703	60185	29.7847	-99.3705	Gastrophyrne_olivacea
1704	321495	29.7899	-99.7797	Eleutherodactylus_marnockii
1705	0	29.792	-103.184	Scaphiopus_couchii
1706	0	29.7927	-104.278	Anaxyrus_punctatus
1707	1396	29.7966	-99.2464	Acris_creptians
1708	1398	29.7966	-99.2464	Acris_creptians
1709	14715	29.8004	-99.5525	Gastrophyrne_olivacea
1710	60978	29.8033	-105.375	Scaphiopus_couchii
1711	172936	29.8038	-103.576	Scaphiopus_couchii
1712	169085	29.8038	-103.576	Scaphiopus_couchii
1713	169036	29.8038	-103.576	Scaphiopus_couchii
1714	139134	29.808	-101.292	Gastrophyrne_olivacea
1715	85086	29.8085	-101.559	Scaphiopus_couchii
1716	90045	29.8088	-101.56	Scaphiopus_couchii
1717	0	29.8092	-104.31	Anaxyrus_punctatus
1718	63913	29.815	-99.5757	Rana_berlandieri
1719	79804	29.815	-99.5757	Rana_berlandieri
1720	79896	29.815	-99.5757	Rana_berlandieri
1721	79897	29.815	-99.5757	Rana_berlandieri
1722	13051	29.8179	-101.553	Pseudacris_clarkii
1723	72780	29.8239	-106.736	Scaphiopus_couchii
1724	39469	29.8243	-99.5787	Craugastor_augusti
1725	7030	29.8409	-101.232	Scaphiopus_couchii
1726	78993	29.8423	-99.575	Rana_berlandieri
1727	78995	29.8423	-99.575	Rana_berlandieri
1728	78998	29.8423	-99.575	Rana_berlandieri
1729	78994	29.8423	-99.575	Rana_berlandieri
1730	78996	29.8423	-99.575	Rana_berlandieri
1731	78997	29.8423	-99.575	Rana_berlandieri
1732	78970	29.8423	-99.575	Rana_catesbeiana
1733	78972	29.8423	-99.575	Rana_catesbeiana
1734	78971	29.8423	-99.575	Rana_catesbeiana
1735	78973	29.8423	-99.575	Rana_catesbeiana
1736	159614	29.8585	-99.3194	Eleutherodactylus_marnockii
1737	0	29.86	-108.69	Anaxyrus_punctatus
1738	7044	29.8654	-101.154	Scaphiopus_couchii
1739	7045	29.8654	-101.154	Scaphiopus_couchii
1740	79001	29.8663	-99.574	Rana_berlandieri
1741	42582	29.87	-106.65	Scaphiopus_couchii
1742	169047	29.876	-103.578	Scaphiopus_couchii
1743	169096	29.876	-103.578	Scaphiopus_couchii
1744	172565	29.876	-103.578	Scaphiopus_couchii
1745	169038	29.876	-103.578	Scaphiopus_couchii
1746	172619	29.876	-103.578	Scaphiopus_couchii
1747	169041	29.876	-103.578	Scaphiopus_couchii
1748	169098	29.8773	-101.718	Scaphiopus_couchii
1749	7041	29.8829	-101.233	Scaphiopus_couchii
1750	85263	29.8833	-101	Rana_berlandieri
1751	32409	29.8843	-101.234	Anaxyrus_punctatus
1752	194411	29.8853	-101.726	Rana_berlandieri
1753	7037	29.8875	-101.154	Scaphiopus_couchii
1754	7046	29.8904	-101.153	Scaphiopus_couchii
1755	7033	29.9082	-101.237	Scaphiopus_couchii
1756	7034	29.9082	-101.237	Scaphiopus_couchii
1757	7035	29.9082	-101.237	Scaphiopus_couchii
1758	42584	29.91	-106.45	Scaphiopus_couchii
1759	42583	29.92	-106.49	Scaphiopus_couchii
1760	112454	29.9269	-99.278	Eleutherodactylus_marnockii
1761	0	29.94	-107.52	Anaxyrus_punctatus
1762	5463	29.9496	-99.3479	Eleutherodactylus_marnockii
1763	7038	29.9503	-101.557	Scaphiopus_couchii
1764	20784	29.96	-106.37	Scaphiopus_couchii
1765	20785	29.96	-106.37	Scaphiopus_couchii
1766	20786	29.96	-106.37	Scaphiopus_couchii
1767	20783	29.96	-106.37	Scaphiopus_couchii
1768	20787	29.96	-106.37	Scaphiopus_couchii
1769	7036	29.9741	-101.253	Scaphiopus_couchii
1770	60979	29.9743	-103.263	Rana_berlandieri
1771	104737	29.9744	-101.173	Acris_creptians
1772	543178	29.9765	-99.1712	Craugastor_augusti
1773	88027	29.9769	-103.392	Gastrophyrne_olivacea
1774	0	29.9793	-99.4437	Acris_creptians
1775	0	29.9793	-99.4437	Acris_creptians
1776	0	29.9793	-99.4437	Acris_creptians
1777	0	29.9793	-99.4437	Acris_creptians
1778	0	29.9793	-99.4437	Acris_creptians
1779	0	29.9793	-99.4437	Acris_creptians
1780	0	29.9793	-99.4437	Acris_creptians
1781	0	29.9793	-99.4437	Acris_creptians
1782	0	29.9793	-99.4437	Acris_creptians
1783	0	29.9793	-99.4437	Acris_creptians
1784	0	29.9793	-99.4437	Acris_creptians
1785	0	29.9793	-99.4437	Acris_creptians
1786	0	29.9793	-99.4437	Acris_creptians
1787	0	29.9793	-99.4437	Acris_creptians
1788	0	29.9793	-99.4437	Acris_creptians
1789	0	29.9793	-99.4437	Acris_creptians
1790	0	29.9793	-99.4437	Acris_creptians
1791	0	29.9793	-99.4437	Acris_creptians
1792	0	29.9793	-99.4437	Acris_creptians
1793	0	29.9793	-99.4437	Acris_creptians
1794	0	29.9793	-99.4437	Acris_creptians
1795	0	29.9793	-99.4437	Acris_creptians
1796	0	29.9793	-99.4437	Acris_creptians
1797	0	29.9793	-99.4437	Acris_creptians
1798	0	29.9793	-99.4437	Acris_creptians
1799	0	29.9793	-99.4437	Acris_creptians
1800	0	29.9793	-99.4437	Acris_creptians
1801	0	29.9793	-99.4437	Acris_creptians
1802	0	29.9793	-99.4437	Acris_creptians
1803	0	29.9793	-99.4437	Acris_creptians
1804	0	29.9793	-99.4437	Acris_creptians
1805	0	29.9793	-99.4437	Acris_creptians
1806	0	29.9793	-99.4437	Acris_creptians
1807	0	29.9793	-99.4437	Acris_creptians
1808	0	29.9793	-99.4437	Acris_creptians
1809	0	29.9793	-99.4437	Acris_creptians
1810	0	29.9793	-99.4437	Acris_creptians
1811	0	29.9793	-99.4437	Acris_creptians
1812	0	29.9793	-99.4437	Acris_creptians
1813	0	29.9793	-99.4437	Acris_creptians
1814	0	29.9793	-99.4437	Acris_creptians
1815	0	29.9793	-99.4437	Acris_creptians
1816	0	29.9793	-99.4437	Acris_creptians
1817	0	29.9793	-99.4437	Acris_creptians
1818	0	29.9793	-99.4437	Acris_creptians
1819	0	29.9793	-99.4437	Acris_creptians
1820	0	29.9793	-99.4437	Acris_creptians
1821	0	29.9793	-99.4437	Acris_creptians
1822	0	29.9793	-99.4437	Acris_creptians
1823	0	29.9793	-99.4437	Acris_creptians
1824	0	29.9793	-99.4437	Acris_creptians
1825	0	29.9793	-99.4437	Acris_creptians
1826	0	29.9793	-99.4437	Acris_creptians
1827	0	29.9793	-99.4437	Acris_creptians
1828	0	29.9793	-99.4437	Acris_creptians
1829	0	29.9793	-99.4437	Acris_creptians
1830	0	29.9793	-99.4437	Acris_creptians
1831	0	29.9793	-99.4437	Acris_creptians
1832	0	29.9793	-99.4437	Acris_creptians
1833	0	29.9793	-99.4437	Acris_creptians
1834	0	29.9793	-99.4437	Acris_creptians
1835	0	29.9793	-99.4437	Acris_creptians
1836	0	29.9793	-99.4437	Acris_creptians
1837	0	29.9793	-99.4437	Acris_creptians
1838	0	29.9793	-99.4437	Acris_creptians
1839	0	29.9793	-99.4437	Acris_creptians
1840	0	29.9793	-99.4437	Acris_creptians
1841	0	29.9793	-99.4437	Acris_creptians
1842	0	29.9793	-99.4437	Acris_creptians
1843	0	29.9793	-99.4437	Acris_creptians
1844	0	29.9793	-99.4437	Acris_creptians
1845	0	29.9793	-99.4437	Acris_creptians
1846	0	29.9793	-99.4437	Acris_creptians
1847	0	29.9793	-99.4437	Acris_creptians
1848	0	29.9793	-99.4437	Acris_creptians
1849	0	29.9793	-99.4437	Acris_creptians
1850	0	29.9793	-99.4437	Acris_creptians
1851	0	29.9793	-99.4437	Acris_creptians
1852	0	29.9793	-99.4437	Acris_creptians
1853	0	29.9793	-99.4437	Acris_creptians
1854	0	29.9793	-99.4437	Acris_creptians
1855	0	29.9793	-99.4437	Acris_creptians
1856	0	29.9793	-99.4437	Acris_creptians
1857	0	29.9793	-99.4437	Acris_creptians
1858	0	29.9793	-99.4437	Acris_creptians
1859	0	29.9793	-99.4437	Acris_creptians
1860	0	29.9793	-99.4437	Acris_creptians
1861	0	29.9793	-99.4437	Acris_creptians
1862	0	29.9793	-99.4437	Acris_creptians
1863	0	29.9793	-99.4437	Acris_creptians
1864	0	29.9793	-99.4437	Acris_creptians
1865	0	29.9793	-99.4437	Acris_creptians
1866	0	29.9793	-99.4437	Acris_creptians
1867	0	29.9793	-99.4437	Acris_creptians
1868	0	29.9793	-99.4437	Acris_creptians
1869	0	29.9793	-99.4437	Acris_creptians
1870	0	29.9793	-99.4437	Acris_creptians
1871	0	29.9793	-99.4437	Acris_creptians
1872	0	29.9793	-99.4437	Acris_creptians
1873	0	29.9793	-99.4437	Acris_creptians
1874	0	29.9793	-99.4437	Acris_creptians
1875	0	29.9793	-99.4437	Acris_creptians
1876	0	29.9793	-99.4437	Acris_creptians
1877	0	29.9793	-99.4437	Acris_creptians
1878	0	29.9793	-99.4437	Acris_creptians
1879	0	29.9793	-99.4437	Acris_creptians
1880	0	29.9793	-99.4437	Acris_creptians
1881	0	29.9793	-99.4437	Acris_creptians
1882	0	29.9793	-99.4437	Acris_creptians
1883	0	29.9793	-99.4437	Acris_creptians
1884	0	29.9793	-99.4437	Acris_creptians
1885	0	29.9793	-99.4437	Acris_creptians
1886	0	29.9793	-99.4437	Acris_creptians
1887	0	29.9793	-99.4437	Acris_creptians
1888	0	29.9793	-99.4437	Acris_creptians
1889	0	29.9793	-99.4437	Acris_creptians
1890	0	29.9793	-99.4437	Acris_creptians
1891	0	29.9793	-99.4437	Acris_creptians
1892	0	29.9793	-99.4437	Acris_creptians
1893	0	29.9793	-99.4437	Acris_creptians
1894	0	29.9793	-99.4437	Acris_creptians
1895	0	29.9793	-99.4437	Acris_creptians
1896	0	29.9793	-99.4437	Acris_creptians
1897	0	29.9793	-99.4437	Acris_creptians
1898	0	29.9793	-99.4437	Acris_creptians
1899	0	29.9793	-99.4437	Acris_creptians
1900	0	29.9793	-99.4437	Acris_creptians
1901	0	29.9793	-99.4437	Acris_creptians
1902	0	29.9793	-99.4437	Acris_creptians
1903	0	29.9793	-99.4437	Acris_creptians
1904	0	29.9793	-99.4437	Acris_creptians
1905	0	29.9793	-99.4437	Acris_creptians
1906	0	29.9793	-99.4437	Acris_creptians
1907	0	29.9793	-99.4437	Acris_creptians
1908	0	29.9793	-99.4437	Acris_creptians
1909	0	29.9793	-99.4437	Acris_creptians
1910	0	29.9793	-99.4437	Acris_creptians
1911	0	29.9793	-99.4437	Acris_creptians
1912	0	29.9793	-99.4437	Acris_creptians
1913	0	29.9793	-99.4437	Acris_creptians
1914	0	29.9793	-99.4437	Acris_creptians
1915	0	29.9793	-99.4437	Acris_creptians
1916	0	29.9793	-99.4437	Acris_creptians
1917	60632	29.9813	-100.936	Rana_berlandieri
1918	60631	29.9813	-100.936	Rana_berlandieri
1919	7032	29.9847	-101.258	Scaphiopus_couchii
1920	7077	30.0255	-102.039	Scaphiopus_couchii
1921	139135	30.0392	-102.104	Gastrophyrne_olivacea
1922	7078	30.0394	-102.098	Scaphiopus_couchii
1923	94341	30.0431	-99.3965	Rana_berlandieri
1924	129084	30.044	-102.037	Rana_berlandieri
1925	129119	30.044	-102.214	Scaphiopus_couchii
1926	129124	30.044	-102.231	Scaphiopus_couchii
1927	129127	30.044	-102.231	Scaphiopus_couchii
1928	129131	30.044	-102.264	Scaphiopus_couchii
1929	129117	30.044	-102.212	Scaphiopus_couchii
1930	129118	30.044	-102.212	Scaphiopus_couchii
1931	129120	30.044	-102.216	Scaphiopus_couchii
1932	129121	30.044	-102.216	Scaphiopus_couchii
1933	129122	30.044	-102.231	Scaphiopus_couchii
1934	129123	30.044	-102.231	Scaphiopus_couchii
1935	129125	30.044	-102.231	Scaphiopus_couchii
1936	129126	30.044	-102.231	Scaphiopus_couchii
1937	129128	30.044	-102.231	Scaphiopus_couchii
1938	129129	30.044	-102.231	Scaphiopus_couchii
1939	129130	30.044	-102.247	Scaphiopus_couchii
1940	106119	30.0443	-103.572	Scaphiopus_couchii
1941	90133	30.0447	-102.114	Anaxyrus_speciosus
1942	90135	30.0447	-102.114	Anaxyrus_speciosus
1943	90134	30.0447	-102.114	Anaxyrus_speciosus
1944	15613	30.0447	-102.114	Rana_berlandieri
1945	15614	30.0447	-102.114	Rana_berlandieri
1946	90767	30.0494	-102.139	Scaphiopus_couchii
1947	7079	30.0602	-102.364	Scaphiopus_couchii
1948	132603	30.0606	-99.5062	Gastrophyrne_olivacea
1949	0	30.0613	-101.179	Anaxyrus_punctatus
1950	188171	30.0649	-101.118	Rana_berlandieri
1951	188172	30.0649	-101.118	Rana_berlandieri
1952	51580	30.07	-106.4	Scaphiopus_couchii
1953	1240	30.0851	-99.501	Acris_creptians
1954	0	30.0977	-103.596	Anaxyrus_punctatus
1955	141133	30.1093	-99.4996	Anaxryus_woodhousii
1956	0	30.1152	-101.309	Anaxyrus_speciosus
1957	52361	30.1196	-99.14	Acris_creptians
1958	7040	30.1326	-101.12	Scaphiopus_couchii
1959	89828	30.1367	-104.406	Spea_multiplicata
1960	89829	30.1367	-104.406	Spea_multiplicata
1961	7616	30.1367	-103.011	Rana_berlandieri
1962	139056	30.1375	-101.115	Scaphiopus_couchii
1963	139057	30.1375	-101.115	Scaphiopus_couchii
1964	61645	30.1399	-101.12	Rana_berlandieri
1965	0	30.1488	-102.537	Anaxyrus_speciosus
1966	188174	30.1523	-101.115	Rana_berlandieri
1967	188173	30.1523	-101.115	Rana_berlandieri
1968	7634	30.1528	-103.288	Rana_berlandieri
1969	7635	30.1528	-103.288	Rana_berlandieri
1970	188170	30.1604	-103.581	Rana_berlandieri
1971	89717	30.1689	-99.1136	Rana_berlandieri
1972	89719	30.1689	-99.1136	Rana_berlandieri
1973	89720	30.1689	-99.1136	Rana_berlandieri
1974	89721	30.1689	-99.1136	Rana_berlandieri
1975	89722	30.1689	-99.1136	Rana_berlandieri
1976	89726	30.1689	-99.1136	Rana_berlandieri
1977	89729	30.1689	-99.1136	Rana_berlandieri
1978	89733	30.1689	-99.1136	Rana_berlandieri
1979	89282	30.1689	-99.1136	Rana_berlandieri
1980	89283	30.1689	-99.1136	Rana_berlandieri
1981	89716	30.1689	-99.1136	Rana_berlandieri
1982	89718	30.1689	-99.1136	Rana_berlandieri
1983	89723	30.1689	-99.1136	Rana_berlandieri
1984	89724	30.1689	-99.1136	Rana_berlandieri
1985	89725	30.1689	-99.1136	Rana_berlandieri
1986	89727	30.1689	-99.1136	Rana_berlandieri
1987	89731	30.1689	-99.1136	Rana_berlandieri
1988	89732	30.1689	-99.1136	Rana_berlandieri
1989	52186	30.177	-106.816	Spea_multiplicata
1990	52187	30.177	-106.816	Spea_multiplicata
1991	52185	30.177	-106.816	Spea_multiplicata
1992	89010	30.1842	-99.1289	Rana_berlandieri
1993	89023	30.1842	-99.1289	Rana_berlandieri
1994	89043	30.1842	-99.1289	Rana_berlandieri
1995	89104	30.1842	-99.1289	Rana_berlandieri
1996	89110	30.1842	-99.1289	Rana_berlandieri
1997	89111	30.1842	-99.1289	Rana_berlandieri
1998	89687	30.1842	-99.1289	Rana_berlandieri
[truncated: 16,324 more rows]
